# Supplementary material for: Hydrogen bonding interactions in fluorinated 1,2,3-triazole derivatives
Source: Royal Society of Chemistry journal article supplement (doi:10.1039/d0nj02914a), 2020-01-01
Supplement: d0nj02914a1.pdf [file d0nj02914a1.pdf]

## Supporting Information

### HYDROGEN BONDING INTERACTIONS IN FLUORINATED 1,2,3-TRIAZOLE DERIVATIVES

E. Espitia Cogollo,<sup>a</sup> O.E. Piro,<sup>b</sup> G.A. Echeverría,<sup>b</sup> M.E Tuttolomondo,<sup>c</sup> H. Pérez,<sup>d</sup> J.L. Jios<sup>e,f\*</sup> and S.E. Ulic,<sup>a,g\*</sup>

**Table S1.** Crystal data and structure refinement results for compounds **1-4**.

|                                                      | (1)                                                                         | (2)                                                                         | (3)                                                                          | (4)                                                                                                                                             |
|------------------------------------------------------|-----------------------------------------------------------------------------|-----------------------------------------------------------------------------|------------------------------------------------------------------------------|-------------------------------------------------------------------------------------------------------------------------------------------------|
| Empirical formula                                    | C <sub>10</sub> H <sub>6</sub> F <sub>3</sub> N <sub>3</sub> O <sub>2</sub> | C <sub>10</sub> H <sub>5</sub> F <sub>3</sub> N <sub>4</sub> O <sub>4</sub> | C <sub>11</sub> H <sub>10</sub> F <sub>3</sub> N <sub>3</sub> O <sub>3</sub> | C <sub>10</sub> H <sub>5</sub> ClF <sub>3</sub> N <sub>3</sub> O <sub>2</sub>                                                                   |
| Formula weight                                       | 257.18                                                                      | 302.18                                                                      | 289.22                                                                       | 291.62                                                                                                                                          |
| Temperature / K                                      | 297(2)                                                                      | 297(2)                                                                      | 297(2)                                                                       | 293(2)                                                                                                                                          |
| Crystal system                                       | monoclinic                                                                  | monoclinic                                                                  | monoclinic                                                                   | triclinic                                                                                                                                       |
| Space group                                          | P2 <sub>1</sub> /n                                                          | P2 <sub>1</sub> /n                                                          | C2/c                                                                         | P-1                                                                                                                                             |
| Unit cell dimensions                                 | <i>a</i> =6.6999(3)Å<br><i>b</i> =20.5919(9)Å<br><i>c</i> =7.6340(4)Å       | <i>a</i> =5.0192(2)Å<br><i>b</i> =17.4035(6)Å<br><i>c</i> =13.0726(5)Å      | <i>a</i> =7.4429(3)Å<br><i>b</i> =21.4011(9)Å<br><i>c</i> =15.5986(7)Å       | <i>a</i> =6.6403(9)Å<br><i>b</i> =8.1037(7)Å<br><i>c</i> =11.1004(13)Å<br><i>α</i> =6.450(9)°<br><i>β</i> =101.623(11)°<br><i>γ</i> =93.168(9)° |
| Volume / Å <sup>3</sup>                              | 1005.15(9)                                                                  | 1139.05(7)                                                                  | 2464.3(2)                                                                    | 557.10(12)                                                                                                                                      |
| Z                                                    | 4                                                                           | 4                                                                           | 4                                                                            | 2                                                                                                                                               |
| <i>ρ</i> calc./mg mm <sup>-3</sup>                   | 1.699                                                                       | 1.762                                                                       | 1.559                                                                        | 1.738                                                                                                                                           |
| <i>μ</i> / mm <sup>-1</sup>                          | 0.158                                                                       | 0.169                                                                       | 0.144                                                                        | 0.386                                                                                                                                           |
| <i>F</i> (000)                                       | 520                                                                         | 608                                                                         | 1184                                                                         | 292                                                                                                                                             |
| Crystal shape/ color                                 | Plate/yellow                                                                | Fragment/colorless                                                          | Fragment/yellow                                                              | Plate/yellow                                                                                                                                    |
| Crystalsize / mm <sup>3</sup>                        | 0.45x0.17x0.07                                                              | 0.37x0.18x0.15                                                              | 0.51x0.47x0.37                                                               | 0.34x0.18x0.03                                                                                                                                  |
| Theta range for data collection                      | 2.97 to 28.83°                                                              | 3.34 to 28.79°                                                              | 3.05 to 29.12°                                                               | 3.32 to 28.50°                                                                                                                                  |
| Index ranges                                         | -8 ≤ <i>h</i> ≤ 8<br>-25 ≤ <i>k</i> ≤ 18<br>-10 ≤ <i>l</i> ≤ 10             | -6 ≤ <i>h</i> ≤ 6<br>-14 ≤ <i>k</i> ≤ 23<br>17 ≤ <i>l</i> ≤ 17              | -9 ≤ <i>h</i> ≤ 6<br>-27 ≤ <i>k</i> ≤ 24<br>-18 ≤ <i>l</i> ≤ 20              | -8 ≤ <i>h</i> ≤ 8<br>-9 ≤ <i>k</i> ≤ 10<br>-13 ≤ <i>l</i> ≤ 13                                                                                  |
| Reflections collected                                | 5024                                                                        | 4851                                                                        | 5772                                                                         | 4085                                                                                                                                            |
| Indep. reflections                                   | 2214<br>[ <i>R</i> (int) = 0.022]                                           | 2451<br>[ <i>R</i> (int)=0.0252]                                            | 2722<br>[ <i>R</i> (int)=0.024]                                              | 2373<br>[ <i>R</i> (int) = 0.017]                                                                                                               |
| Data / restraints / parameters                       | 2214 / 0 / 187                                                              | 2451 / 0 / 210                                                              | 2722 / 0 / 195                                                               | 2373 / 0 / 192                                                                                                                                  |
| Goodness-of-fit on <i>F</i> <sup>2</sup>             | 1.028                                                                       | 1.020                                                                       | 1.028                                                                        | 1.039                                                                                                                                           |
| Final <i>R</i> indexes [ <i>I</i> > 2σ ( <i>I</i> )] | <i>R</i> 1 = 0.0397<br><i>wR</i> 2 = 0.931                                  | <i>R</i> 1 = 0.0535<br><i>wR</i> 2 = 0.1287                                 | <i>R</i> 1 = 0.0516<br><i>wR</i> 2 = 0.1328                                  | <i>R</i> 1 = 0.0482<br><i>wR</i> 2 = 0.1044                                                                                                     |
| Largest diff. peak/hole/ e Å <sup>-3</sup>           | 0.242 / -0.219                                                              | 0.269 / -0.248                                                              | 0.463 / -0.348                                                               | 0.242 / -0.260                                                                                                                                  |

**Table S2** Lattice energies ( $\text{kJ mol}^{-1}$ ) partitioned into coulombic ( $E_{\text{Coul}}$ ), polarization ( $E_{\text{Pol}}$ ), dispersion ( $E_{\text{Disp}}$ ) and repulsion ( $E_{\text{Rep}}$ ) components for **1** – **4**. Normalized % in parenthesis.<sup>a</sup>

| Compound | $E_{\text{Coul}}$ | $E_{\text{Pol}}$ | $E_{\text{Dis}}$ | $E_{\text{Rep}}$ | $E_{\text{TOT}}$ |
|----------|-------------------|------------------|------------------|------------------|------------------|
| <b>1</b> | -60.8 (31.0)      | -22.5 (11.5)     | -113.0 (57.6)    | 71.2             | -125.1           |
| <b>2</b> | -60.0 (30.8)      | -19.1 (9.8)      | -115.4 (59.3)    | 67.8             | -126.7           |
| <b>3</b> | -85.8 (43.4)      | -43.0 (21.7)     | -69.1 (34.9)     | 97.9             | -100.0           |
| <b>4</b> | -48.9 (25.5)      | -23.0 (12.0)     | -119.7 (62.5)    | 66.6             | -125.0           |

<sup>a</sup> Value obtained after normalizing to 100% the sum of the attractive energy contributions.

### Hirshfeld surface analysis

It is worthwhile to note a pair of small red spots labeled 4 in  $d_{\text{norm}}$  surface of structure **3** corresponding to  $\text{H}\cdots\text{C}$  contacts, which are also visible as a pair of symmetrical spikes labeled 2 at  $(d_e + d_i) \approx 2.8 \text{ \AA}$  (sum of  $r_{\text{vdW}} = 2.9 \text{ \AA}$ ) in the FP. These contacts can be attributed to weak  $\text{C}-\text{H}\cdots\pi$  interactions with (methyl)H11A $\cdots$ Cg2 distance of 3.162(2)  $\text{ \AA}$  according to X-ray crystal determination. This distance value and the angle  $\gamma$  value of  $30.2^\circ$  (calculated for us) between the Cg2–H11A vector and the normal to the phenyl ring are near but slightly larger than those commonly accepted for this type of interactions ( $\text{H}\cdots\text{Cg} < 3.0 \text{ \AA}$ ,  $\gamma < 30^\circ$ ). Therefore, it is expected that they contribute little to the crystal stability. This result is in accordance with those obtained from PIXEL calculations in which, for this compound, dispersive forces are the ones that contribute the least to the lattice energies (see Table 2).

**Table S3.** Enrichment ratio ( $E_{XY}$ )\*of selected intermolecular contacts for compounds **1-4**.

| Interaction          | <b>1</b> | <b>2</b> | <b>3</b> | <b>4</b> |
|----------------------|----------|----------|----------|----------|
| <b>O···H/H···O</b>   | 1.75     | 1.70     | 1.45     | 2.07     |
| <b>F···H/H···F</b>   | 1.49     | 1.31     | 1.26     | 1.50     |
| <b>C···H/H···C</b>   | 0.25     | 1.09     | 1.02     | 1.07     |
| <b>N···H/H···N</b>   | 1.20     | 0.91     | 0.69     | 1.06     |
| <b>Cl···H/H···Cl</b> | -        | -        | -        | 1.24     |
| <b>C···C</b>         | 3.75     | 0.86     | 1.75     | 2.68     |
| <b>F···F</b>         | 0.80     | 1.78     | 1.63     | 0.73     |
| <b>F···O/O···F</b>   | -        | 0.28     | -        | -        |
| <b>F···N/N···F</b>   | 1.33     | -        | 0.88     | 1.45     |
| <b>F···Cl/Cl···F</b> | -        | -        | -        | 1.27     |
| <b>F···C/C···F</b>   | 0.43     | 0.71     | /        | /        |
| <b>O···O</b>         | /        | 0.85     | /        | -        |
| <b>N···O/O···N</b>   | /        | 1.29     | -        | /        |
| <b>C···O/O···C</b>   | /        | 0.68     | 1.32     | /        |
| <b>N···C/C···N</b>   | 0.94     | 2.15     | /        | 1.17     |
| <b>C···Cl/Cl···C</b> | -        | -        | -        | 1.03     |
| <b>O···Cl/Cl···O</b> | -        | -        | -        | 1.30     |

\*The values were computed for interactions with  $C_{XY} > 3.0\%$

In comparison with the unsubstituted compound **1** (Del% = 47.4%), the percentages of  $\pi$ -delocalization for compounds **2** (48.0%) and **4** (51.0%) are slightly higher due to the electron-withdrawing effect of the nitro and chlorine substituent groups, which destabilizes the phenyl ring favoring the formation of KE form.

The proportion of Hirshfeld surface contact  $C_{XY}$  (%), the proportion of chemical type on the molecular surface  $S_x$ , and ratio of random contacts  $R_{XY}$  between two chemical elements X and Y are given in Table S3, ESI†. The enrichment ratio  $E_{XY}$  of a pair of elements (X,Y) is defined as the ratio between the proportion of actual contacts in the crystal ( $C_{XY}$ ) and the theoretical proportion of random contacts ( $R_{XY}$ ). An enrichment ratio larger than unity for a given pair of chemical species  $X\cdots Y$  indicates that these contacts are over-represented in the crystal packing when compared to equi-probable contacts computed from the chemical composition on the Hirshfeld surface.

However, in comparison to the also favoured  $F\cdots H$  contacts for **2** ( $E_{FH} = 1.31$ ) and **3** ( $E_{FH} = 1.26$ ), the corresponding  $F\cdots F$  contacts are much more enriched for both the compounds ( $E_{FF} = 1.78/1.63$ ), and hence with longer likelihood of occurrence as a consequence of close-packing effect bringing the trifluoromethyl groups nearer to each other.<sup>1-3</sup> These results suggest that the propensity for C-F group to form  $F\cdots F$  inter-halogen bond in this type of compounds (CHFNO data set) may play an important role in stabilizing the crystal structures. Concerning compound **4**, the  $Cl\cdots H$  contacts are also enriched with  $E_{ClH} = 1.24$  larger than unity, as reported in literature<sup>3</sup> for various aromatic systems containing that type of halogen.

**Table S4.** Hirshfeld contact surfaces  $C_{XY}(\%)^*$ , proportion of chemical type on the molecular surface  $S_x$  (%), and random contacts  $R_{XY}(\%)$  of intermolecular interactions for compounds **1-4**.

| $C_{XY}$                 | <b>1</b> | <b>2</b> | <b>3</b> | <b>4</b> |
|--------------------------|----------|----------|----------|----------|
| H···H                    | 13.0     | 1.6      | 20.2     | 2.5      |
| C···H / H···C            | 3.4      | 9.5      | 12.4     | 9.5      |
| N···H / H···N            | 10.0     | 5.9      | 9.7      | 7.2      |
| O···H / H···O            | 12.8     | 23.0     | 13.9     | 12.4     |
| F···H / H···F            | 28.4     | 16.6     | 21.3     | 21.8     |
| Cl···H / H···Cl          | -        | -        | -        | 8.8      |
| C···C                    | 10.5     | 1.9      | 2.8      | 5.1      |
| C···O / O···C            | 2.4      | 4.7      | 3.3      | -        |
| O···O                    | -        | 4.6      | -        | -        |
| F···F                    | 4.5      | 8.4      | 4.9      | 3.3      |
| F···O / O···F            | -        | 2.8      | -        | -        |
| F···C / C···F            | 3.4      | 4.6      | 2.2      | 1.9      |
| F···N / N···F            | 6.5      | 2.6      | 4.4      | 6.8      |
| N···O / O···N            | -        | 6.7      | -        | -        |
| N···C / C···N            | 3.2      | 7.1      | -        | 3.4      |
| N···N                    | -        | -        | 1.6      | -        |
| C···Cl / Cl···C          | -        | -        | -        | 3.1      |
| O···Cl / Cl···O          | -        | -        | -        | 2.6      |
| F···Cl / Cl···F          | -        | -        | -        | 6.2      |
| Surface $S_x$            |          |          |          |          |
| H                        | 40.3     | 29.1     | 48.9     | 32.4     |
| C                        | 16.7     | 14.9     | 12.5     | 13.7     |
| N                        | 10.3     | 11.2     | 14.4     | 10.5     |
| O                        | 9.1      | 23.2     | 9.8      | 9.2      |
| F                        | 23.7     | 21.7     | 17.3     | 22.3     |
| Cl                       | -        | -        | -        | 11.0     |
| Random contacts $R_{XY}$ |          |          |          |          |
| H···H                    | 16.2     | 8.5      | 23.9     | 10.5     |
| C···H / H···C            | 13.5     | 8.7      | 12.2     | 8.9      |
| N···H / H···N            | 8.3      | 6.5      | 14.1     | 6.8      |
| O···H / H···O            | 7.3      | 13.5     | 9.6      | 6.0      |
| F···H / H···F            | 19.1     | 12.6     | 16.9     | 14.5     |
| Cl···H / H···Cl          | -        | -        | -        | 7.1      |
| C···C                    | 2.8      | 2.2      | 1.6      | 1.9      |
| C···O / O···C            | 3.0      | 6.9      | 2.5      | -        |
| O···O                    | 0.8      | 5.4      | 1.0      | -        |
| F···F                    | 5.6      | 4.7      | 3.0      | 4.5      |
| F···O / O···F            | -        | -        | -        | -        |
| F···C / C···F            | 7.9      | 6.5      | 4.3      | 6.1      |
| F···N / N···F            | 4.9      | 4.9      | 5.0      | 4.7      |
| N···O / O···N            | -        | 5.2      | -        | -        |
| N···C / C···N            | 3.4      | 3.3      | -        | 2.9      |
| N···N                    | -        | -        | 2.1      | -        |
| C···Cl / Cl···C          | -        | -        | -        | 3.0      |
| O···Cl / Cl···O          | -        | -        | -        | 2.0      |
| F···Cl / Cl···F          | -        | -        | -        | 4.9      |

\*Data obtained from CrystalExplorer3.0, including reciprocal contacts.  $C_{XY}$  values lower than 1.5% were not included.

**Table S5.** Pseudo ring calculated geometrical parameters of 1–4.

| Compound | Basis set <sup>[b]</sup> | Parameters <sup>[a]</sup> |       |       |         |                |                |                |                |
|----------|--------------------------|---------------------------|-------|-------|---------|----------------|----------------|----------------|----------------|
|          |                          | O-H                       | O...O | H...O | <OH...O | d <sub>1</sub> | d <sub>2</sub> | d <sub>3</sub> | d <sub>4</sub> |
| 1        | 6-31(d.p)                | 0.992                     | 2.543 | 1.648 | 147.8   | 1.336          | 1.430          | 1.463          | 1.245          |
|          | 6-311++(d.p)             | 0.986                     | 2.567 | 1.691 | 145.9   | 1.338          | 1.426          | 1.462          | 1.237          |
|          | CC-pVDZ                  | 0.997                     | 2.531 | 1.625 | 148.7   | 1.335          | 1.433          | 1.467          | 1.245          |
| 2        | 6-31(d.p)                | 0.996                     | 2.531 | 1.632 | 147.9   | 1.328          | 1.433          | 1.471          | 1.243          |
|          | 6-311++(d.p)             | 0.989                     | 2.555 | 1.675 | 145.9   | 1.329          | 1.430          | 1.471          | 1.235          |
|          | CC-pVDZ                  | 1.000                     | 2.521 | 1.613 | 148.7   | 1.327          | 1.436          | 1.474          | 1.243          |
| 3        | 6-31(d.p)                | 0.992                     | 2.544 | 1.649 | 147.7   | 1.337          | 1.427          | 1.462          | 1.246          |
|          | 6-311++(d.p)             | 0.985                     | 2.570 | 1.694 | 145.7   | 1.339          | 1.423          | 1.461          | 1.237          |
|          | CC-pVDZ                  | 0.997                     | 2.532 | 1.628 | 148.6   | 1.336          | 1.430          | 1.466          | 1.245          |
| 4        | 6-31(d.p)                | 0.993                     | 2.539 | 1.645 | 147.6   | 1.335          | 1.429          | 1.467          | 1.244          |
|          | 6-311++(d.p)             | 0.986                     | 2.564 | 1.689 | 145.6   | 1.337          | 1.425          | 1.466          | 1.236          |
|          | CC-pVDZ                  | 0.997                     | 2.526 | 1.623 | 148.4   | 1.334          | 1.432          | 1.471          | 1.244          |

<sup>[a]</sup> Distances (Å) and angles (°); Experimental geometrical parameters defined in Table 1

<sup>[b]</sup>Functional B3LYP

**Table S6.** Experimental and calculated geometrical parameters of **1**.

| Parameter  | Bond lengths (Å) |                    |                        |             | Parameter           | Angles (°)         |                    |                        |             |
|------------|------------------|--------------------|------------------------|-------------|---------------------|--------------------|--------------------|------------------------|-------------|
|            | Exp              | Calculated (B3LYP) |                        |             |                     | Exp <sup>[b]</sup> | Calculated (B3LYP) |                        |             |
|            | DRX              | 6-31g<br>(d.p)     | 6-<br>311++<br>g (d.p) | cc-<br>PVDZ |                     | DRX                | 6-31g<br>(d.p)     | 6-<br>311++<br>g (d.p) | cc-<br>PVDZ |
| C(1)-C(6)  | 1.406            | 1.415              | 1.413                  | 1.416       | C(6)-C(1)-C(2)      | 117.4              | 118.3              | 118.3                  | 118.2       |
| C(1)-C(2)  | 1.412            | 1.430              | 1.426                  | 1.430       | C(6)-C(1)-C(7)      | 123.2              | 123.6              | 123.1                  | 123.5       |
| C(1)-C(7)  | 1.461            | 1.463              | 1.462                  | 1.465       | C(2)-C(1)-C(7)      | 119.4              | 118.0              | 118.5                  | 118.3       |
| C(2)-O(1)  | 1.343            | 1.336              | 1.338                  | 1.339       | O(1)-C(2)-C(3)      | 116.4              | 117.6              | 117.4                  | 117.2       |
| C(2)-C(3)  | 1.392            | 1.406              | 1.402                  | 1.405       | O(1)-C(2)-C(1)      | 123.5              | 122.8              | 122.9                  | 123.1       |
| C(3)-C(4)  | 1.367            | 1.384              | 1.383                  | 1.385       | C(3)-C(2)-C(1)      | 120.0              | 119.7              | 119.7                  | 119.7       |
| C(4)-C(5)  | 1.379            | 1.405              | 1.403                  | 1.405       | C(4)-C(3)-C(2)      | 120.7              | 120.3              | 120.3                  | 120.3       |
| C(5)-C(6)  | 1.372            | 1.383              | 1.381                  | 1.383       | C(3)-C(4)-C(5)      | 120.4              | 120.9              | 120.9                  | 120.8       |
| C(7)-O(2)  | 1.235            | 1.245              | 1.237                  | 1.244       | C(6)-C(5)-C(4)      | 120.0              | 119.6              | 119.5                  | 119.6       |
| C(7)-C(8)  | 1.488            | 1.492              | 1.495                  | 1.492       | C(5)-C(6)-C(1)      | 121.5              | 121.3              | 121.3                  | 121.4       |
| C(8)-N(3)  | 1.337            | 1.339              | 1.335                  | 1.340       | O(2)-C(7)-C(1)      | 121.2              | 121.8              | 122.1                  | 121.9       |
| C(8)-C(9)  | 1.408            | 1.421              | 1.419                  | 1.422       | O(2)-C(7)-C(8)      | 115.1              | 115.0              | 115.6                  | 114.9       |
| C(9)-N(1)  | 1.327            | 1.331              | 1.327                  | 1.331       | C(1)-C(7)-C(8)      | 123.8              | 123.2              | 122.3                  | 123.2       |
| C(9)-C(10) | 1.486            | 1.506              | 1.505                  | 1.506       | N(3)-C(8)-C(9)      | 107.1              | 107.6              | 107.5                  | 107.6       |
| C(10)-F(3) | 1.33             | 1.345              | 1.345                  | 1.346       | N(3)-C(8)-C(7)      | 124.9              | 125.3              | 124.3                  | 125.4       |
| C(10)-F(1) | 1.334            | 1.344              | 1.346                  | 1.343       | C(9)-C(8)-C(7)      | 127.9              | 127.0              | 128.0                  | 126.8       |
| C(10)-F(2) | 1.336            | 1.347              | 1.348                  | 1.347       | N(1)-C(9)-C(8)      | 109.3              | 108.9              | 108.8                  | 108.9       |
| N(1)-N(2)  | 1.317            | 1.327              | 1.322                  | 1.326       | N(1)-C(9)-<br>C(10) | 118.7              | 120.2              | 120.3                  | 120.0       |
| N(2)-N(3)  | 1.312            | 1.324              | 1.322                  | 1.323       | C(8)-C(9)-<br>C(10) | 132.0              | 130.9              | 130.9                  | 131.0       |
|            |                  |                    |                        |             | F(3)-C(10)-F(1)     | 106.9              | 107.7              | 107.4                  | 107.7       |
|            |                  |                    |                        |             | F(3)-C(10)-F(2)     | 107.0              | 107.8              | 107.6                  | 107.8       |
|            |                  |                    |                        |             | F(1)-C(10)-F(2)     | 105.9              | 108.2              | 107.8                  | 108.2       |
|            |                  |                    |                        |             | F(3)-C(10)-C(9)     | 111.3              | 110.4              | 111.0                  | 110.4       |
|            |                  |                    |                        |             | F(1)-C(10)-C(9)     | 112.8              | 111.7              | 112.0                  | 111.8       |
|            |                  |                    |                        |             | F(2)-C(10)-C(9)     | 112.6              | 110.8              | 111.0                  | 110.9       |
|            |                  |                    |                        |             | N(2)-N(1)-C(9)      | 102.7              | 103.0              | 103.3                  | 103.0       |
|            |                  |                    |                        |             | N(3)-N(2)-N(1)      | 117.1              | 116.9              | 116.6                  | 117.0       |
|            |                  |                    |                        |             | N(2)-N(3)-C(8)      | 103.7              | 103.5              | 103.7                  | 103.5       |

  

| Parameter           | Dihedral (°) |                    |                        |             |
|---------------------|--------------|--------------------|------------------------|-------------|
|                     | Exp          | Calculated (B3LYP) |                        |             |
|                     | DRX          | 6-31g<br>(d.p)     | 6-<br>311++<br>g (d.p) | cc-<br>PVDZ |
| C(2)-C(1)-C(7)-(C8) | 171.7        | 176.4              | 175.8                  | 175.5       |
| C(1)-C(7)-C(8)-(C9) | 176.0        | 157.4              | 148.6                  | 160.0       |

**Table S7.** Experimental and calculated geometrical parameters of **2**.

| Parameter  | Bond lengths (Å) |                    |                        |             | Parameter           | Angles (°)         |                    |                        |             |
|------------|------------------|--------------------|------------------------|-------------|---------------------|--------------------|--------------------|------------------------|-------------|
|            | Exp              | Calculated (B3LYP) |                        |             |                     | Exp <sup>[b]</sup> | Calculated (B3LYP) |                        |             |
|            | DRX              | 6-31g<br>(d.p)     | 6-<br>311++<br>g (d.p) | cc-<br>PVDZ |                     | DRX                | 6-31g<br>(d.p)     | 6-<br>311++<br>g (d.p) | cc-<br>PVDZ |
| C(1)-C(6)  | 1.39<br>6        | 1.406              | 1.404                  | 1.409       | C(6)-C(1)-C(2)      | 117.<br>6          | 118.5              | 118.5                  | 118.4       |
| C(1)-C(2)  | 1.42<br>1        | 1.433              | 1.430                  | 1.436       | C(6)-C(1)-C(7)      | 123.<br>7          | 123.5              | 123.0                  | 123.8       |
| C(1)-C(7)  | 1.46<br>7        | 1.471              | 1.471                  | 1.474       | C(2)-C(1)-C(7)      | 118.<br>7          | 118.1              | 118.5                  | 117.8       |
| C(2)-O(3)  | 1.33<br>7        | 1.328              | 1.329                  | 1.327       | O(3)-C(2)-C(3)      | 116.<br>6          | 117.5              | 117.3                  | 117.4       |
| C(2)-C(3)  | 1.39<br>5        | 1.410              | 1.407                  | 1.413       | O(3)-C(2)-C(1)      | 122.<br>9          | 122.6              | 122.8                  | 122.8       |
| C(3)-C(4)  | 1.36             | 1.379              | 1.377                  | 1.381       | C(3)-C(2)-C(1)      | 120.<br>5          | 119.9              | 119.9                  | 119.8       |
| C(4)-C(5)  | 1.38<br>6        | 1.404              | 1.401                  | 1.405       | C(4)-C(3)-C(2)      | 120.<br>8          | 120.6              | 120.6                  | 120.7       |
| C(5)-C(6)  | 1.37<br>1        | 1.383              | 1.380                  | 1.384       | C(3)-C(4)-C(5)      | 118.<br>7          | 119.3              | 119.3                  | 119.2       |
| C(5)-N(1)  | 1.45<br>5        | 1.464              | 1.470                  | 1.470       | C(6)-C(5)-C(4)      | 122.<br>4          | 121.8              | 121.7                  | 121.8       |
| C(7)-O(4)  | 1.23<br>1        | 1.243              | 1.235                  | 1.243       | C(6)-C(5)-N(1)      | 118.<br>8          | 119.0              | 119.0                  | 119.0       |
| C(7)-C(8)  | 1.48<br>4        | 1.487              | 1.489                  | 1.489       | C(4)-C(5)-N(1)      | 118.<br>7          | 119.2              | 119.3                  | 119.2       |
| C(8)-N(2)  | 1.34             | 1.340              | 1.336                  | 1.341       | C(5)-C(6)-C(1)      | 120.<br>0          | 120.0              | 120.1                  | 120.1       |
| C(8)-C(9)  | 1.4              | 1.422              | 1.420                  | 1.426       | O(4)-C(7)-C(1)      | 120.<br>8          | 120.9              | 121.2                  | 120.6       |
| C(9)-N(4)  | 1.32<br>6        | 1.330              | 1.327                  | 1.331       | O(4)-C(7)-C(8)      | 115.<br>8          | 115.8              | 116.4                  | 115.5       |
| C(9)-C(10) | 1.49<br>5        | 1.507              | 1.506                  | 1.509       | C(1)-C(7)-C(8)      | 123.<br>4          | 123.2              | 122.4                  | 123.9       |
| C(10)-F(1) | 1.31<br>7        | 1.346              | 1.348                  | 1.345       | N(2)-C(8)-C(9)      | 107.<br>6          | 107.7              | 107.5                  | 107.4       |
| C(10)-F(2) | 1.32<br>2        | 1.344              | 1.345                  | 1.345       | N(2)-C(8)-C(7)      | 125.<br>0          | 125.0              | 124.1                  | 125.7       |
| C(10)-F(3) | 1.32<br>6        | 1.344              | 1.343                  | 1.344       | C(9)-C(8)-C(7)      | 127.<br>4          | 127.3              | 128.2                  | 127.0       |
| N(1)-O(1)  | 1.21<br>7        | 1.232              | 1.226                  | 1.227       | N(4)-C(9)-C(8)      | 109.<br>3          | 108.8              | 108.7                  | 108.7       |
| N(1)-O(2)  | 1.21<br>6        | 1.232              | 1.226                  | 1.227       | N(4)-C(9)-<br>C(10) | 118.<br>2          | 120.2              | 120.2                  | 119.5       |
| N(2)-N(3)  | 1.31<br>2        | 1.321              | 1.319                  | 1.317       | C(8)-C(9)-<br>C(10) | 132.<br>4          | 131.0              | 131.1                  | 131.8       |
| N(3)-N(4)  | 1.31<br>9        | 1.327              | 1.323                  | 1.326       | F(1)-C(10)-F(2)     | 106.<br>1          | 108.2              | 107.8                  | 108.1       |
|            |                  |                    |                        |             | F(1)-C(10)-F(3)     | 107.<br>1          | 107.9              | 107.6                  | 107.6       |
|            |                  |                    |                        |             | F(2)-C(10)-F(3)     | 107.<br>6          | 107.9              | 107.5                  | 107.6       |
|            |                  |                    |                        |             | F(1)-C(10)-C(9)     | 113.<br>2          | 110.7              | 110.9                  | 111.5       |
|            |                  |                    |                        |             | F(2)-C(10)-C(9)     | 112.<br>2          | 111.5              | 111.8                  | 111.5       |
|            |                  |                    |                        |             | F(3)-C(10)-C(9)     | 110.<br>4          | 110.5              | 110.9                  | 110.3       |

| Parameter               | Dihedral (°) |                    |                        |             | O(1)-N(1)-O(2) | 122.<br>9 | 124.6 | 124.6 | 124.8 |                |           |       |       |       |
|-------------------------|--------------|--------------------|------------------------|-------------|----------------|-----------|-------|-------|-------|----------------|-----------|-------|-------|-------|
|                         | Exp          | Calculated (B3LYP) |                        |             |                |           |       |       |       | O(1)-N(1)-C(5) | 118.<br>5 | 117.9 | 117.9 | 117.8 |
|                         | DRX          | 6-31g<br>(d.p)     | 6-<br>311++<br>g (d.p) | cc-<br>PVDZ |                |           |       |       |       | O(2)-N(1)-C(5) | 118.<br>6 | 117.5 | 117.5 | 117.3 |
| C(2)-C(1)-C(7)-<br>(C8) | 174.<br>7    | 177.1              | 175.3                  | -180.0      | N(3)-N(2)-C(8) | 103.<br>3 | 103.5 | 103.8 | 103.8 |                |           |       |       |       |
| C(1)-C(7)-C(8)-<br>(C9) | 169.<br>9    | 161.5              | 154.3                  | -180.0      | N(2)-N(3)-N(4) | 117.<br>1 | 116.9 | 116.6 | 117.0 |                |           |       |       |       |
|                         |              |                    |                        |             | N(3)-N(4)-C(9) | 102.<br>7 | 103.1 | 103.4 | 103.2 |                |           |       |       |       |



**Table S8.** Experimental and Calculated geometrical parameters of **3**.

| Parameter  | Bond lengths (Å) |                    |                        |             | Parameter           | Angles (°)         |                    |                        |             |
|------------|------------------|--------------------|------------------------|-------------|---------------------|--------------------|--------------------|------------------------|-------------|
|            | Exp              | Calculated (B3LYP) |                        |             |                     | Exp <sup>[b]</sup> | Calculated (B3LYP) |                        |             |
|            | DRX              | 6-31g<br>(d.p)     | 6-<br>311++<br>g (d.p) | cc-<br>PVDZ |                     | DRX                | 6-31g<br>(d.p)     | 6-<br>311++<br>g (d.p) | cc-<br>PVDZ |
| C(1)-C(2)  | 1.40<br>5        | 1.427              | 1.423                  | 1.430       | C(2)-C(1)-C(6)      | 118.<br>1          | 118.5              | 118.5                  | 118.4       |
| C(1)-C(6)  | 1.40<br>2        | 1.417              | 1.415                  | 1.419       | C(2)-C(1)-C(7)      | 118.<br>9          | 118.0              | 118.5                  | 117.7       |
| C(1)-C(7)  | 1.45<br>8        | 1.462              | 1.461                  | 1.466       | C(6)-C(1)-C(7)      | 123.<br>0          | 123.6              | 123.0                  | 123.9       |
| C(2)-O(1)  | 1.35<br>5        | 1.337              | 1.339                  | 1.336       | O(1)-C(2)-C(3)      | 118.<br>3          | 117.7              | 117.6                  | 117.7       |
| C(2)-C(3)  | 1.38<br>1        | 1.406              | 1.402                  | 1.409       | O(1)-C(2)-C(1)      | 122.<br>0          | 123.0              | 123.1                  | 123.1       |
| C(3)-C(4)  | 1.36<br>9        | 1.382              | 1.381                  | 1.384       | C(3)-C(2)-C(1)      | 119.<br>7          | 119.2              | 119.2                  | 119.2       |
| C(4)-C(5)  | 1.38<br>9        | 1.412              | 1.410                  | 1.414       | C(4)-C(3)-C(2)      | 120.<br>4          | 120.3              | 120.3                  | 120.5       |
| C(5)-C(6)  | 1.37<br>5        | 1.386              | 1.383                  | 1.388       | C(3)-C(4)-C(5)      | 121.<br>7          | 121.9              | 121.9                  | 121.8       |
| C(5)-C(11) | 1.50<br>9        | 1.510              | 1.510                  | 1.510       | C(6)-C(5)-C(4)      | 117.<br>7          | 117.8              | 117.7                  | 117.8       |
| C(7)-O(2)  | 1.23<br>2        | 1.246              | 1.237                  | 1.245       | C(6)-C(5)-<br>C(11) | 121.<br>2          | 121.7              | 121.8                  | 121.8       |
| C(7)-C(8)  | 1.48<br>6        | 1.492              | 1.495                  | 1.494       | C(4)-C(5)-<br>C(11) | 121.<br>0          | 120.5              | 120.6                  | 120.5       |
| C(8)-N(3)  | 1.33<br>6        | 1.339              | 1.335                  | 1.341       | C(5)-C(6)-C(1)      | 122.<br>3          | 122.3              | 122.3                  | 122.4       |
| C(8)-C(9)  | 1.39<br>7        | 1.421              | 1.419                  | 1.426       | O(2)-C(7)-C(1)      | 121.<br>8          | 121.8              | 122.2                  | 121.5       |
| C(9)-N(1)  | 1.32<br>4        | 1.331              | 1.327                  | 1.332       | O(2)-C(7)-C(8)      | 115.<br>6          | 115.0              | 115.6                  | 114.7       |
| C(9)-C(10) | 1.48<br>3        | 1.505              | 1.504                  | 1.508       | C(1)-C(7)-C(8)      | 122.<br>6          | 123.2              | 122.3                  | 123.8       |
| C(10)-F(1) | 1.30<br>7        | 1.347              | 1.348                  | 1.344       | N(3)-C(8)-C(9)      | 107.<br>4          | 107.7              | 107.5                  | 107.4       |
| C(10)-F(3) | 1.30<br>9        | 1.346              | 1.345                  | 1.346       | N(3)-C(8)-C(7)      | 124.<br>9          | 125.2              | 124.2                  | 126.0       |
| C(10)-F(2) | 1.32<br>4        | 1.344              | 1.346                  | 1.347       | C(9)-C(8)-C(7)      | 127.<br>5          | 127.0              | 128.0                  | 126.6       |
| N(1)-N(2)  | 1.31<br>2        | 1.327              | 1.322                  | 1.325       | N(1)-C(9)-C(8)      | 109.<br>3          | 108.9              | 108.9                  | 108.8       |
| N(2)-N(3)  | 1.32<br>1        | 1.324              | 1.323                  | 1.321       | N(1)-C(9)-<br>C(10) | 119.<br>5          | 120.2              | 120.2                  | 119.7       |
|            |                  |                    |                        |             | C(8)-C(9)-<br>C(10) | 131.<br>3          | 130.9              | 130.9                  | 131.5       |
|            |                  |                    |                        |             | F(1)-C(10)-F(3)     | 108.<br>4          | 107.8              | 107.5                  | 107.4       |
|            |                  |                    |                        |             | F(1)-C(10)-F(2)     | 106.<br>1          | 108.1              | 107.8                  | 108.1       |
|            |                  |                    |                        |             | F(3)-C(10)-F(2)     | 104.<br>9          | 107.7              | 107.4                  | 107.5       |
|            |                  |                    |                        |             | F(1)-C(10)-C(9)     | 112.<br>3          | 110.8              | 111.0                  | 112.0       |
|            |                  |                    |                        |             | F(3)-C(10)-C(9)     | 112.<br>0          | 110.4              | 111.0                  | 110.3       |
|            |                  |                    |                        |             | F(2)-C(10)-C(9)     | 112.<br>7          | 111.7              | 112.0                  | 111.3       |

  

| Parameter | Dihedral (°) |                    |                        |             |
|-----------|--------------|--------------------|------------------------|-------------|
|           | Exp          | Calculated (B3LYP) |                        |             |
|           | DRX          | 6-31g<br>(d.p)     | 6-<br>311++<br>g (d.p) | cc-<br>PVDZ |
|           |              |                    |                        |             |

---

|                         |           |       |       |       |                |           |       |       |       |
|-------------------------|-----------|-------|-------|-------|----------------|-----------|-------|-------|-------|
|                         |           |       |       |       | N(2)-N(1)-C(9) | 103.<br>5 | 103.0 | 103.3 | 103.1 |
| C(2)-C(1)-C(7)-<br>(C8) | 170.<br>8 | 176.5 | 175.0 | 178.5 | N(1)-N(2)-N(3) | 116.<br>0 | 116.9 | 116.6 | 117.0 |
| C(1)-C(7)-C(8)-<br>(C9) | 151.<br>0 | 156.3 | 148.2 | 164.3 | N(2)-N(3)-C(8) | 103.<br>9 | 103.5 | 103.7 | 103.7 |

---

**Table S9.** Experimental and Calculated geometrical parameters of **4**.

| Parameter  | Bond lengths (Å) |                    |                        |             | Parameter           | Angles (°)         |                    |                        |             |
|------------|------------------|--------------------|------------------------|-------------|---------------------|--------------------|--------------------|------------------------|-------------|
|            | Exp              | Calculated (B3LYP) |                        |             |                     | Exp <sup>[b]</sup> | Calculated (B3LYP) |                        |             |
|            | DRX              | 6-31g<br>(d.p)     | 6-<br>311++<br>g (d.p) | cc-<br>PVDZ |                     | DRX                | 6-31g<br>(d.p)     | 6-<br>311++<br>g (d.p) | cc-<br>PVDZ |
| C(1)-C(2)  | 1.410            | 1.429              | 1.425                  | 1.432       | C(2)-C(1)-C(6)      | 118.4              | 118.7              | 118.7                  | 118.6       |
| C(1)-C(6)  | 1.409            | 1.415              | 1.413                  | 1.417       | C(2)-C(1)-C(7)      | 119.6              | 118.0              | 118.5                  | 117.7       |
| C(1)-C(7)  | 1.453            | 1.467              | 1.466                  | 1.471       | C(6)-C(1)-C(7)      | 122.0              | 123.3              | 122.8                  | 123.7       |
| C(2)-O(1)  | 1.338            | 1.335              | 1.337                  | 1.334       | O(1)-C(2)-C(3)      | 116.6              | 117.5              | 117.3                  | 117.4       |
| C(2)-C(3)  | 1.397            | 1.407              | 1.403                  | 1.409       | O(1)-C(2)-C(1)      | 123.8              | 123.0              | 123.1                  | 123.1       |
| C(3)-C(4)  | 1.371            | 1.383              | 1.381                  | 1.385       | C(3)-C(2)-C(1)      | 119.6              | 119.5              | 119.5                  | 119.4       |
| C(4)-C(5)  | 1.385            | 1.404              | 1.401                  | 1.406       | C(4)-C(3)-C(2)      | 120.5              | 120.7              | 120.7                  | 120.9       |
| C(5)-C(6)  | 1.364            | 1.380              | 1.377                  | 1.383       | C(3)-C(4)-C(5)      | 120.1              | 119.8              | 119.8                  | 119.7       |
| C(5)-Cl    | 1.735            | 1.760              | 1.759                  | 1.761       | C(6)-C(5)-C(4)      | 120.8              | 120.9              | 120.8                  | 120.9       |
| C(7)-O(2)  | 1.239            | 1.244              | 1.236                  | 1.244       | C(6)-C(5)-Cl        | 119.7              | 119.8              | 119.9                  | 119.8       |
| C(7)-C(8)  | 1.49             | 1.490              | 1.492                  | 1.492       | C(4)-C(5)-Cl        | 119.4              | 119.2              | 119.3                  | 119.2       |
| C(8)-N(3)  | 1.337            | 1.340              | 1.336                  | 1.341       | C(5)-C(6)-C(1)      | 120.5              | 120.4              | 120.4                  | 120.5       |
| C(8)-C(9)  | 1.397            | 1.422              | 1.420                  | 1.427       | O(2)-C(7)-C(1)      | 122.0              | 121.3              | 121.7                  | 120.9       |
| C(9)-N(1)  | 1.336            | 1.330              | 1.327                  | 1.332       | O(2)-C(7)-C(8)      | 115.5              | 115.3              | 115.8                  | 114.9       |
| C(9)-C(10) | 1.488            | 1.506              | 1.506                  | 1.509       | C(1)-C(7)-C(8)      | 122.5              | 123.4              | 122.5                  | 124.2       |
| C(10)-F(1) | 1.334            | 1.344              | 1.345                  | 1.345       | N(3)-C(8)-C(9)      | 108.1              | 107.6              | 107.5                  | 107.3       |
| C(10)-F(3) | 1.33             | 1.346              | 1.344                  | 1.346       | N(3)-C(8)-C(7)      | 123.6              | 125.3              | 124.4                  | 126.0       |
| C(10)-F(2) | 1.328            | 1.345              | 1.348                  | 1.345       | C(9)-C(8)-C(7)      | 127.9              | 127.0              | 128.0                  | 126.7       |
| N(1)-N(2)  | 1.317            | 1.327              | 1.322                  | 1.325       | N(1)-C(9)-C(8)      | 109.3              | 108.9              | 108.8                  | 108.8       |
| N(2)-N(3)  | 1.326            | 1.3223             | 1.3207                 | 1.3187      | N(1)-C(9)-<br>C(10) | 119.5              | 120.1              | 120.2                  | 119.3       |
|            |                  |                    |                        |             | C(8)-C(9)-<br>C(10) | 131.1              | 131.0              | 131.1                  | 131.9       |
|            |                  |                    |                        |             | F(1)-C(10)-F(3)     | 107.8              | 107.8              | 107.4                  | 107.5       |
|            |                  |                    |                        |             | F(1)-C(10)-F(2)     | 105.8              | 108.2              | 107.8                  | 108.2       |
|            |                  |                    |                        |             | F(3)-C(10)-F(2)     | 107.2              | 107.9              | 107.6                  | 107.5       |
|            |                  |                    |                        |             | F(1)-C(10)-C(9)     | 112.9              | 111.6              | 111.9                  | 111.6       |
|            |                  |                    |                        |             | F(3)-C(10)-C(9)     | 111.5              | 110.4              | 110.9                  | 110.2       |
|            |                  |                    |                        |             | F(2)-C(10)-C(9)     | 111.3              | 110.8              | 111.0                  | 111.6       |

  

| Parameter | Dihedral (°) |                    |                        |             |
|-----------|--------------|--------------------|------------------------|-------------|
|           | Exp          | Calculated (B3LYP) |                        |             |
|           | DRX          | 6-31g<br>(d.p)     | 6-<br>311++<br>g (d.p) | cc-<br>PVDZ |
|           |              |                    |                        |             |

|                         |           |       |       |        |                |           |       |       |       |
|-------------------------|-----------|-------|-------|--------|----------------|-----------|-------|-------|-------|
|                         |           |       |       |        | N(2)-N(1)-C(9) | 102.<br>6 | 103.1 | 103.3 | 103.2 |
| C(2)-C(1)-C(7)-<br>(C8) | 167.<br>0 | 177.3 | 175.9 | -180.0 | N(1)-N(2)-N(3) | 117.<br>0 | 116.9 | 116.6 | 117.0 |
| C(1)-C(7)-C(8)-<br>(C9) | 158.<br>2 | 160.2 | 152.0 | -179.9 | N(2)-N(3)-C(8) | 103.<br>1 | 103.5 | 103.8 | 103.8 |

**Table S10** Experimental and calculated frequencies and tentative assignment of fundamental vibration modes of **1**.

| Mode            | Experimental <sup>[a]</sup> |                      | Calculated <sup>[b]</sup> |                    | Assignment <sup>[f]</sup>                                                                            |
|-----------------|-----------------------------|----------------------|---------------------------|--------------------|------------------------------------------------------------------------------------------------------|
|                 | IR <sup>[c]</sup>           | Raman <sup>[d]</sup> | Freq <sup>[a]</sup>       | Int <sup>[e]</sup> |                                                                                                      |
| v <sub>1</sub>  |                             |                      | 3660                      | 143                | v(N2—H)                                                                                              |
| v <sub>2</sub>  | 3331 (vs)                   | 3330 (23)            | 3295                      | 316                | v(O1—H)                                                                                              |
| v <sub>3</sub>  | 3136 (w)                    | 3136 (4)             | 3247                      | 4                  | v(C6—H)                                                                                              |
| v <sub>4</sub>  |                             | 3100 (11)            | 3220                      | 6                  | v(C3—H)                                                                                              |
| v <sub>5</sub>  |                             |                      | 3209                      | 13                 | v(C5—H)                                                                                              |
| v <sub>6</sub>  |                             | 3064 (9)             | 3189                      | 9                  | v(C4—H)                                                                                              |
| v <sub>7</sub>  | 1628 (vs)                   |                      | 1691                      | 248                | v(C7—O2); δ(C2—O1—H); v(C—C)                                                                         |
| v <sub>8</sub>  | 1603 (vs)                   | 1602 (69)            | 1661                      | 60                 | v(C7—O2)                                                                                             |
| v <sub>9</sub>  | 1567 (s)                    | 1565 (25)            | 1628                      | 105                | δ(C2—O1—H)                                                                                           |
| v <sub>10</sub> | 1517 (s)                    | 1515 (35)            | 1561                      | 35                 | δ(N2—H); v(C9—N1)                                                                                    |
| v <sub>11</sub> | 1492 (s)                    | 1492 (47)            | 1534                      | 117                | δ(C—H) <sub>iph</sub> ; δ(O1—H)                                                                      |
| v <sub>12</sub> | 1482 (s)                    |                      | 1532                      | 27                 | v(C8—C9)                                                                                             |
| v <sub>13</sub> | 1446 (s)                    | 1444 (23)            | 1494                      | 65                 | δ(C3—H) <sub>iph</sub> ; δ(C4—H) <sub>iph</sub> ; δ(C5—H) <sub>iph</sub>                             |
| v <sub>14</sub> | 1426 (vs)                   | 1426 (14)            | 1461                      | 137                | δ(N2—H)                                                                                              |
| v <sub>15</sub> | 1392 (sh)                   |                      | 1431                      | 91                 | δ(O1—H); δ(C6—H)                                                                                     |
| v <sub>16</sub> | 1338 (vs)                   | 1338 (10)            | 1381                      | 62                 | v(C8—C9)                                                                                             |
| v <sub>17</sub> | 1327 (vs)                   | 1328 (10)            | 1374                      | 24                 | v(C8—N3)                                                                                             |
| v <sub>18</sub> | 1321 (vs)                   | 1322 (h)             | 1362                      | 132                | v(C2—O1); δ(C—H) <sub>iph</sub>                                                                      |
| v <sub>19</sub> | 1261 (m)                    |                      | 1317                      | 92                 | δ(C2—O1—H); v(C1—C6); δ(C6—H); v <sub>as</sub> (N1—N2—N3)                                            |
| v <sub>20</sub> | 1236 (m)                    |                      | 1280                      | 51                 | v(C1—C7); δ(C6—H) <sub>iph</sub> ; δ(C3—H) <sub>oph</sub>                                            |
| v <sub>21</sub> | 1212 (vs)                   | 1212 (13)            | 1246                      | 160                | δ(C3—H—H) <sub>iph</sub> ; δ(C5—H) <sub>oph</sub> ; δ(C6—H) <sub>iph</sub> v <sub>s</sub> (N1—N2—N3) |
| v <sub>22</sub> | 1187 (vs)                   | 1176 (41)            | 1227                      | 110                | v(N2—N3)                                                                                             |
| v <sub>23</sub> | 1158 (vs)                   |                      | 1218                      | 252                | v <sub>as</sub> (CF <sub>3</sub> )                                                                   |
| v <sub>24</sub> |                             | 1154 (41)            | 1215                      | 47                 | v <sub>as</sub> (CF <sub>3</sub> )                                                                   |
| v <sub>25</sub> |                             |                      | 1190                      | 2                  | δ(C—H)                                                                                               |
| v <sub>26</sub> | 1136 (vs)                   | 1136 (35)            | 1184                      | 110                | v(N1—N2)                                                                                             |
| v <sub>27</sub> | 1120 (sh)                   | 1120 (h)             | 1153                      | 7                  | δ(C3—H) <sub>iph</sub> ; δ(C3—H) <sub>oph</sub> ; δ(C4—H) <sub>iph</sub> ; δ(C6—H) <sub>oph</sub>    |
| v <sub>28</sub> | 1073 (vs)                   |                      | 1092                      | 190                | v <sub>s</sub> (CF <sub>3</sub> )                                                                    |
| v <sub>29</sub> | 1036 (m)                    | 1036 (41)            | 1062                      | 4                  | δ(C4—C5)                                                                                             |
| v <sub>30</sub> | 993 (m)                     | 993 (4)              | 1008                      | 12                 | δ(C8—N3—N2); δ(C9—N1—N2)                                                                             |
| v <sub>31</sub> |                             |                      | 996                       | <1                 | γ(C3—H) <sub>iph</sub> ; γ(C4—H) <sub>oph</sub> ; γ(C5—H) <sub>iph</sub> ; γ(C6—H) <sub>oph</sub>    |
| v <sub>32</sub> |                             |                      | 965                       | 5                  | γ(C3—H) <sub>iph</sub> ; γ(C4—H) <sub>oph</sub> ; γ(C5—H) <sub>oph</sub> ; γ(C6—H) <sub>iph</sub>    |
| v <sub>33</sub> | 919 (vs)                    | 919 (4)              | 934                       | 118                | δ(C4—C5—C6)                                                                                          |
| v <sub>34</sub> | 866 (w)                     |                      | 877                       | 0                  | γ(C3—H) <sub>iph</sub> ; γ(C4—H) <sub>iph</sub> ; γ(C5—H) <sub>oph</sub> ; γ(C6—H) <sub>oph</sub>    |
| v <sub>35</sub> | 818 (f)                     | 819 (100)            | 850                       | 78                 | γ(O1—H)                                                                                              |
| v <sub>36</sub> | 808 (w)                     |                      | 839                       | 21                 | δ(C4—C5—C6); δ(C4—H) <sub>iph</sub> ; δ(C6—H) <sub>iph</sub>                                         |
| v <sub>37</sub> |                             |                      | 810                       | 7                  | γ(O1—H); γ(C—H) <sub>iph</sub> ; γ(C7—C8—C9)                                                         |
| v <sub>38</sub> | 753 (vs)                    | 752 (85)             | 773                       | 59                 | γ(C—H) <sub>iph</sub>                                                                                |
| v <sub>39</sub> |                             |                      | 758                       | 6                  | γ(O1—H); γ(C—H) <sub>iph</sub> ; γ(C8—C9—C10)                                                        |
| v <sub>40</sub> | 745 (s)                     |                      | 749                       | 13                 | δ <sub>s</sub> (CF <sub>3</sub> )                                                                    |
| v <sub>41</sub> |                             |                      | 725                       | 36                 | γ(N2—H)                                                                                              |

|      |          |          |     |    |                                                                                                                    |
|------|----------|----------|-----|----|--------------------------------------------------------------------------------------------------------------------|
| v 42 | 690 (s)  | 690 (h)  | 695 | 23 | $\delta(\text{C2—C3—C4}); \delta(\text{C1—C6—C5})$                                                                 |
| v 43 | 681 (s)  | 679 (44) | 693 | 35 | $\gamma(\text{C1—C7—C8}); \gamma(\text{C3—H})_{\text{iph}}; \gamma(\text{C5—H})_{\text{iph}}; \gamma(\text{N2—H})$ |
| v 44 | 613 (vw) | 613 (15) | 618 | 4  | $\delta(\text{N2—H}); \delta(\text{C1—C7—C8}); \gamma(\text{N1—N2—N3})$                                            |
| v 45 |          |          | 583 | 4  | $\delta_{\text{as}}(\text{CF}_3)$                                                                                  |
| v 46 | 583 (w)  | 583 (53) | 571 | 42 | $\gamma(\text{N2—H})$                                                                                              |
| v 47 | 563 (vw) | 563 (19) | 559 | 3  | $\gamma(\text{N2—H}); \delta_{\text{as}}(\text{CF}_3); \gamma(\text{N1—N2—N3})$                                    |
| v 48 | 542 (vw) | 541 (33) | 537 | 1  | $\gamma(\text{C—H})_{\text{oph}}$                                                                                  |
| v 49 | 523 (w)  | 522 (7)  | 532 | 3  | $\gamma(\text{C—H})_{\text{iph}}$                                                                                  |
| v 50 | 487 (w)  | 489 (7)  | 500 | 6  | $\delta(\text{C1—C2—O1})$                                                                                          |
| v 51 | 435 (vw) | 437 (11) | 443 | 7  | $\delta(\text{C7—O2})$                                                                                             |
| v 52 | 429 (w)  | 428 (26) | 441 | 2  | $\gamma(\text{C2—C1—C6}); \gamma(\text{C3—H})_{\text{iph}}; \gamma(\text{C6—H})_{\text{iph}}$                      |
| v 53 | 407 (vw) | 409 (14) | 422 | 1  | $\delta(\text{C8—C9—C10}); \delta(\text{C2—C1—C7})$                                                                |
| v 54 |          |          | 403 | <1 | $\delta(\text{CF}_3)$                                                                                              |
| v 55 |          | 365 (10) | 365 | 4  | $\rho_{\text{wag}}(\text{CF}_3); \delta(\text{C2—C1—C7})$                                                          |
| v 56 |          |          | 275 | 3  | $\delta(\text{C2—C1—C7})$                                                                                          |
| v 57 |          |          | 265 | <1 | $\gamma(\text{C2—O1})$                                                                                             |
| v 58 |          |          | 249 | 2  | $\rho_{\text{tw}}(\text{CF}_3)$                                                                                    |
| v 59 |          | 214 (14) | 213 | <1 | $\gamma(\text{C7—C8—C9})$                                                                                          |
| v 60 |          | 187 (11) | 171 | <1 | $\gamma(\text{C8—C9—C10})$                                                                                         |
| v 61 |          |          | 147 | <1 | $\gamma(\text{C7—O2})$                                                                                             |
| v 62 |          | 157 (29) | 137 | <1 | $\tau(\text{C2—C1—C7—C8})$                                                                                         |
| v 63 |          |          | 100 | <1 | $\tau(\text{C1—C7—C8—C9})$                                                                                         |
| v 64 |          |          | 57  | <1 | $\rho_{\text{r}}(\text{CF}_3)$                                                                                     |
| v 65 |          |          | 40  | <1 | $\tau(\text{C2—C1—C7—C8})$                                                                                         |
| v 66 |          |          | 15  | <1 | $\tau(\text{C1—C7—C8—C9})$                                                                                         |

[a]In  $\text{cm}^{-1}$  [b]B3LYP 6-31g (d,p) [c]vs, very strong; s, strong; m, medium; w, weak; sh, shoulder. [d]Intensity (arbitrary units). [e]Intensity (km/mol) [f] $\nu$ ,  $\delta$ ,  $\gamma$ ,  $\tau$ ,  $\rho_{\text{r}}$ ,  $\rho_{\text{tw}}$  and  $\rho_{\text{wag}}$  represent stretching, in plane deformation, out-of-plane deformation, torsion, rocking, wagging and twisting modes. Iph and oph represent in phase and out-of-phase modes, respectively.

**Table S11** Experimental and calculated frequencies and tentative assignment of fundamental vibration modes of **2**.

| Mode            | Experimental <sup>[a]</sup> |                      | Calculated <sup>[b]</sup> |                    | Assignment <sup>[f]</sup>                                                   |
|-----------------|-----------------------------|----------------------|---------------------------|--------------------|-----------------------------------------------------------------------------|
|                 | IR <sup>[c]</sup>           | Raman <sup>[d]</sup> | Freq <sup>[a]</sup>       | Int <sup>[e]</sup> |                                                                             |
| v <sub>1</sub>  | 3673 (vw)                   |                      | 3654                      | 152                | v(N3—H)                                                                     |
| v <sub>2</sub>  |                             |                      | 3273                      | 25                 | v(C6—H)                                                                     |
| v <sub>3</sub>  |                             |                      | 3246                      | 6                  | v(C4—H)                                                                     |
| v <sub>4</sub>  | 3271 (m)                    |                      | 3238                      | 428                | v(O3—H)                                                                     |
| v <sub>5</sub>  | 3120 (w)                    |                      | 3225                      | 3                  | v(C3—H)                                                                     |
| v <sub>6</sub>  | 1637 (vs)                   | 1642 (5)             | 1695                      | 314                | v(C7—O4); δ(C2—O3—H); v(C—C)                                                |
| v <sub>7</sub>  | 1617 (s)                    | 1620 (4)             | 1674                      | 185                | v(C7—O4)                                                                    |
| v <sub>8</sub>  | 1571 (m)                    | 1573 (13)            | 1636                      | 102                | v <sub>as</sub> (NO <sub>2</sub> )                                          |
| v <sub>9</sub>  |                             |                      | 1617                      | 37                 | δ(C2—O3—H)                                                                  |
| v <sub>10</sub> | 1523 (s)                    |                      | 1561                      | 32                 | δ(N3—H); v(C9—N4)                                                           |
| v <sub>11</sub> | 1515 (s)                    | 1516 (6)             | 1533                      | 33                 | v(C8—C9)                                                                    |
| v <sub>12</sub> | 1493 (m)                    |                      | 1524                      | 183                | δ(C—H) <sub>iph</sub> ; δ(O3—H)                                             |
| v <sub>13</sub> |                             |                      | 1480                      | 2                  | v(C5—C6); v(C1—C6); δ(C4—H)                                                 |
| v <sub>14</sub> | 1428 (m)                    | 1427 (3)             | 1460                      | 134                | δ(N3—H)                                                                     |
| v <sub>15</sub> | 1411 (m)                    |                      | 1439                      | 60                 | δ(O3—H); δ(C6—H)                                                            |
| v <sub>16</sub> | 1342 (vs)                   | 1343 (100)           | 1392                      | 431                | v <sub>s</sub> (NO <sub>2</sub> )                                           |
| v <sub>17</sub> |                             | 1337 (45)            | 1381                      | 118                | v(C8—C9)                                                                    |
| v <sub>18</sub> | 1328 (vs)                   |                      | 1376                      | 89                 | v(C8—N3)                                                                    |
| v <sub>19</sub> | 1302 (s)                    | 1303 (25)            | 1350                      | 72                 | v(C2—O3); δ(C—H) <sub>iph</sub>                                             |
| v <sub>20</sub> | 1277 (s)                    | 1278 (3)             | 1324                      | 116                | δ(C2—O3—H); v(C1—C6); δ(C6—H); v <sub>as</sub> (N2—N3—N4)                   |
| v <sub>21</sub> | 1235 (m)                    | 1233 (3)             | 1271                      | 65                 | v(C1—C7); δ(C6—H) <sub>iph</sub> ; δ(C3—H) <sub>oph</sub>                   |
| v <sub>22</sub> | 1211 (s)                    |                      | 1241                      | 94                 | δ(C3—H) <sub>iph</sub> ; δ(C6—H) <sub>iph</sub> ; v <sub>s</sub> (N2—N3—N4) |
| v <sub>23</sub> | 1186 (vs)                   |                      | 1235                      | 197                | v(N2—N3)                                                                    |
| v <sub>24</sub> | 1164 (vs)                   |                      | 1218                      | 242                | v <sub>as</sub> (CF <sub>3</sub> )                                          |
| v <sub>25</sub> |                             |                      | 1214                      | 46                 | v <sub>as</sub> (CF <sub>3</sub> )                                          |
| v <sub>26</sub> | 1150 (vs)                   |                      | 1183                      | 83                 | v(N4—N3)                                                                    |
| v <sub>27</sub> | 1127 (m)                    |                      | 1150                      | 17                 | δ(C3—H) <sub>iph</sub> ; δ(C4—H) <sub>oph</sub> ; δ(C6—H) <sub>oph</sub>    |
| v <sub>28</sub> | 1114 (w)                    | 1114 (15)            | 1133                      | 20                 | δ(C4—H) <sub>iph</sub> ; δ(C6—H) <sub>iph</sub>                             |
| v <sub>29</sub> | 1070 (vs)                   |                      | 1089                      | 236                | v <sub>s</sub> (CF <sub>3</sub> )                                           |
| v <sub>30</sub> | 995 (w)                     | 994 (4)              | 1009                      | 11                 | δ(C8—N2—N3); δ(C9—N4—N3)                                                    |
| v <sub>31</sub> |                             |                      | 999                       | <1                 | γ(C3—H) <sub>iph</sub> ; γ(C4—H) <sub>oph</sub>                             |
| v <sub>32</sub> | 948 (s)                     | 948 (1)              | 970                       | 100                | δ(C4—C5—C6)                                                                 |
| v <sub>33</sub> | 938 (w)                     | 935 (2)              | 959                       | 10                 | γ(C6—H)                                                                     |
| v <sub>34</sub> |                             |                      | 886                       | 60                 | γ(O3—H)                                                                     |
| v <sub>35</sub> | 866 (s)                     | 865 (16)             | 878                       | 53                 | δ <sub>s</sub> (NO <sub>2</sub> )                                           |
| v <sub>36</sub> | 860 (m)                     |                      | 859                       | 57                 | γ(C3—H) <sub>iph</sub> ; γ(C4—H) <sub>iph</sub>                             |
| v <sub>37</sub> | 813 (m)                     | 811 (3)              | 830                       | 4                  | δ(C4—C5—C6); δ(C4—H) <sub>iph</sub> ; δ(C6—H) <sub>iph</sub>                |
| v <sub>38</sub> |                             |                      | 808                       | <1                 | γ(O3—H); γ(C—H) <sub>iph</sub> ; γ(C7—C8—C9)                                |
| v <sub>39</sub> | 753 (w)                     | 757 (8)              | 761                       | 7                  | δ(C2—C1—C7); δ <sub>s</sub> (CF <sub>3</sub> )                              |
| v <sub>40</sub> |                             |                      | 754                       | 10                 | γ(NO <sub>2</sub> ); γ(C6—H); γ(C1—C2—C3)                                   |
| v <sub>41</sub> |                             |                      | 747                       | 29                 | γ(O3—H); γ(C—H) <sub>iph</sub> ; γ(C8—C9—C10); γ(NO <sub>2</sub> )          |

|      |          |          |     |    |                                                                                                           |
|------|----------|----------|-----|----|-----------------------------------------------------------------------------------------------------------|
| v 42 | 731 (s)  |          | 743 | 86 | $\delta_s(\text{CF}_3)$                                                                                   |
| v 43 |          |          | 726 | 32 | $\gamma(\text{N3—H})$                                                                                     |
| v 44 | 691 (w)  |          | 690 | 17 | $\gamma(\text{C1—C7—C8}); \gamma(\text{C3—H}); \gamma(\text{N3—H})$                                       |
| v 45 | 642 (m)  | 641 (1)  | 653 | 17 | $\delta(\text{C1—C6—C5}); \delta(\text{C2—C3—C4})$                                                        |
| v 46 | 608 (vw) | 607 (1)  | 612 | 7  | $\gamma(\text{N3—H}); \delta(\text{C1—C7—C8})$                                                            |
| v 47 |          |          | 590 | 35 | $\gamma(\text{N3—H})$                                                                                     |
| v 48 | 570 (vw) | 570 (3)  | 571 | <1 | $\gamma(\text{N3—H}); \delta_{as}(\text{CF}_3); \gamma(\text{N1—N2—N3})$                                  |
| v 49 |          | 559 (1)  | 560 | 5  | $\delta(\text{C3—H})_{iph}; \delta(\text{C4—H})_{iph}; \delta(\text{C6—H})_{iph}; \delta(\text{C5—NO}_2)$ |
| v 50 | 549 (w)  | 550 (3)  | 549 | 4  | $\delta_{as}(\text{CF}_3)$                                                                                |
| v 51 | 512 (vw) | 511 (1)  | 521 | 3  | $\gamma(\text{C—H})_{iph}$                                                                                |
| v 52 | 488 (vw) | 488 (2)  | 495 | <1 | $\delta(\text{C1—C2—O3})$                                                                                 |
| v 53 | 444 (vw) |          | 447 | <1 | $\gamma(\text{C2—C1—C6}); \gamma(\text{C3—H})_{iph}; \gamma(\text{C6—H})_{iph}$                           |
| v 54 | 435 (vw) | 435 (<1) | 443 | 8  | $\delta(\text{C7—O3})$                                                                                    |
| v 55 | 410 (vw) | 414 (<1) | 414 | <1 | $\delta(\text{C8—C9—C10}); \delta(\text{C2—C1—C7})$                                                       |
| v 56 |          |          | 404 | <1 | $\delta(\text{CF}_3)$                                                                                     |
| v 57 |          | 372 (1)  | 368 | 6  | $\rho_{wag}(\text{CF}_3); \delta(\text{C2—C1—C7})$                                                        |
| v 58 |          |          | 358 | 1  | $\delta(\text{C1—C2—C3}); \delta(\text{C4—C5—C6})$                                                        |
| v 59 |          |          | 316 | <1 | $\gamma(\text{C1—C2—C3}); \gamma(\text{4—C5—C6})$                                                         |
| v 60 |          | 290 (5)  | 292 | 2  | $\delta(\text{C2—C1—C7}); \delta(\text{C5—NO}_2)$                                                         |
| v 61 |          |          | 251 | 1  | $\rho_{tw}(\text{CF}_3)$                                                                                  |
| v 62 |          | 220 (5)  | 233 | 2  | $\delta(\text{C7—C8—N2})$                                                                                 |
| v 63 |          | 182 (6)  | 204 | 3  | $\gamma(\text{C7—C8—C9})$                                                                                 |
| v 64 |          | 161 (8)  | 165 | <1 | $\gamma(\text{C8—C9—C10})$                                                                                |
| v 65 |          |          | 148 | <1 | $\gamma(\text{C7—O4})$                                                                                    |
| v 66 |          |          | 125 | 2  | $\gamma(\text{C6—H})$                                                                                     |
| v 67 |          |          | 117 | 2  | $\tau(\text{C2—C1—C7—C8})$                                                                                |
| v 68 |          |          | 82  | 1  | $\tau(\text{C1—C7—C8—C9})$                                                                                |
| v 69 |          |          | 67  | <1 | $\rho_{tw}(\text{CF}_3)$                                                                                  |
| v 70 |          |          | 55  | <1 | $\rho_{tw}(\text{CF}_3)$                                                                                  |
| v 71 |          |          | 34  | <1 | $\tau(\text{C2—C1—C7—C8})$                                                                                |
| v 72 |          |          | 15  | <1 | $\tau(\text{C1—C7—C8—C9})$                                                                                |

[a]In  $\text{cm}^{-1}$  [b]B3LYP 6-31g (d,p) [c]vs, very strong; s, strong; m, medium; w, weak; sh, shoulder. [d]Intensity (arbitrary units). [e]Intensity (km/mol) [f] $\nu$ ,  $\delta$ ,  $\gamma$ ,  $\tau$ ,  $\rho_r$ ,  $\rho_{tw}$  and  $\rho_{wag}$  represent stretching, in plane deformation, out-of-plane deformation, torsion, rocking, wagging and twisting modes. Iph and oph represent in phase and out-of-phase modes, respectively.



**Table S12** Experimental and calculated frequencies and tentative assignment of fundamental vibration modes of **3**.

| Mode            | Experimental <sup>[a]</sup> |                      | Calculated <sup>[b]</sup> |                    | Assignment <sup>[f]</sup>                                                   |
|-----------------|-----------------------------|----------------------|---------------------------|--------------------|-----------------------------------------------------------------------------|
|                 | IR <sup>[c]</sup>           | Raman <sup>[d]</sup> | Freq <sup>[a]</sup>       | Int <sup>[e]</sup> |                                                                             |
| v <sub>1</sub>  |                             |                      | 3661                      | 139                | v(N2—H)                                                                     |
| v <sub>2</sub>  | 3336 (vs)                   |                      | 3296                      | 304                | v(O1—H)                                                                     |
| v <sub>3</sub>  |                             |                      | 3236                      | 3                  | v(C6—H)                                                                     |
| v <sub>4</sub>  |                             |                      | 3217                      | 5                  | v(C3—H)                                                                     |
| v <sub>5</sub>  |                             |                      | 3177                      | 16                 | v(C4—H)                                                                     |
| v <sub>6</sub>  |                             |                      | 3127                      | 14                 | v <sub>as</sub> (CH <sub>3</sub> )                                          |
| v <sub>7</sub>  |                             |                      | 3092                      | 20                 | v <sub>as</sub> (CH <sub>3</sub> )                                          |
| v <sub>8</sub>  | 2928 (w)                    | 2931 (21)            | 3038                      | 38                 | v <sub>s</sub> (CH <sub>3</sub> )                                           |
| v <sub>9</sub>  | 1630 (vs)                   | 1631 (53)            | 1695                      | 191                | v(C7—O2); δ(C2—O1—H); v(C—C)                                                |
| v <sub>10</sub> | 1612 (m)                    | 1612 (11)            | 1662                      | 80                 | v(C7—O2)                                                                    |
| v <sub>11</sub> | 1576 (s)                    | 1576 (100)           | 1633                      | 131                | δ(C2—O1—H)                                                                  |
| v <sub>12</sub> | 1523 (s)                    | 1524 (34)            | 1560                      | 37                 | δ(N2—H); v(C9—N1)                                                           |
| v <sub>13</sub> | 1495 (m)                    |                      | 1535                      | 148                | δ(C—H) <sub>iph</sub> ; δ(O1—H)                                             |
| v <sub>14</sub> |                             | 1517 (29)            | 1532                      | 24                 | v(C8—C9)                                                                    |
| v <sub>15</sub> | 1475 (s)                    | 1476 (34)            | 1514                      | 36                 | δ <sub>as</sub> (CH <sub>3</sub> )                                          |
| v <sub>16</sub> |                             | 1462 (h)             | 1499                      | 5                  | δ <sub>as</sub> (CH <sub>3</sub> )                                          |
| v <sub>17</sub> | 1427 (vs)                   |                      | 1462                      | 142                | δ(N2—H)                                                                     |
| v <sub>18</sub> |                             | 1412 (53)            | 1457                      | <1                 | δ(O—H); δ(C6—H); δ <sub>as</sub> (CH <sub>3</sub> )                         |
| v <sub>19</sub> | 1382 (w)                    | 1382 (12)            | 1435                      | 63                 | δ <sub>s</sub> (CH <sub>3</sub> )                                           |
| v <sub>20</sub> |                             |                      | 1429                      | 34                 | δ <sub>s</sub> (CH <sub>3</sub> )                                           |
| v <sub>21</sub> | 1346 (vs)                   | 1347 (40)            | 1383                      | 136                | v(C8—C9)                                                                    |
| v <sub>22</sub> |                             | 1333 (17)            | 1376                      | 10                 | v(C8—N3)                                                                    |
| v <sub>23</sub> | 1312 (s)                    | 1311 (46)            | 1353                      | 110                | v(C2—O1); δ(C—H) <sub>iph</sub>                                             |
| v <sub>24</sub> | 1267 (m)                    | 1266 (7)             | 1317                      | 96                 | v(C2—O1); v(C1—C6); δ(C6—H); v <sub>as</sub> (N1—N2—N3)                     |
| v <sub>25</sub> |                             | 1241 (24)            | 1287                      | 55                 | v(C1—7); δ(3—H) <sub>iph</sub> ; δ(C6—H) <sub>oph</sub>                     |
| v <sub>26</sub> | 1234 (w)                    |                      | 1249                      | 113                | δ(C3—H) <sub>iph</sub> ; δ(C6—H) <sub>iph</sub> ; v <sub>s</sub> (N1—N2—N3) |
| v <sub>27</sub> |                             | 1206 (18)            | 1231                      | 118                | δ(CH <sub>3</sub> ); δ(C—H) <sub>iph</sub> ; δ(N2—H)                        |
| v <sub>28</sub> | 1189 (vs)                   | 1190 (8)             | 1225                      | 83                 | v(N2—N3)                                                                    |
| v <sub>29</sub> | 1156 (vs)                   |                      | 1218                      | 252                | v <sub>as</sub> (CF <sub>3</sub> )                                          |
| v <sub>30</sub> |                             |                      | 1199                      | 11                 | v <sub>as</sub> (CF <sub>3</sub> )                                          |
| v <sub>31</sub> | 1127 (vs)                   | 1129 (42)            | 1183                      | 100                | v(N1—N2)                                                                    |
| v <sub>32</sub> |                             |                      | 1162                      | 8                  | δ(C3—H) <sub>iph</sub> ; δ(C4—H) <sub>oph</sub>                             |
| v <sub>33</sub> | 1074 (vs)                   | 1072 (32)            | 1092                      | 198                | v <sub>s</sub> (CF <sub>3</sub> )                                           |
| v <sub>34</sub> |                             |                      | 1070                      | 3                  | ρ <sub>r</sub> (CH <sub>3</sub> )                                           |
| v <sub>35</sub> |                             |                      | 1032                      | <1                 | ρ <sub>r</sub> (CH <sub>3</sub> )                                           |
| v <sub>36</sub> | 990 (m)                     | 990 (15)             | 1008                      | 15                 | δ(C8—N3—N2); δ(C9—N1—N2)                                                    |
| v <sub>37</sub> | 979 (vw)                    | 978 (6)              | 982                       | 1                  | γ(C3—H) <sub>iph</sub> ; γ(C4—H) <sub>oph</sub>                             |
| v <sub>38</sub> | 950 (s)                     | 949 (11)             | 966                       | 77                 | δ(C4—C5—C6)                                                                 |
| v <sub>39</sub> |                             |                      | 906                       | 3                  | γ(C6—H) <sub>iph</sub> ; γ(C3—H) <sub>oph</sub>                             |
| v <sub>40</sub> |                             | 849 (69)             | 863                       | 62                 | δ(C4—C5—C6); δ(C4—H) <sub>iph</sub> ; δ(C6—H) <sub>iph</sub>                |
| v <sub>41</sub> |                             |                      | 855                       | 8                  | γ(O1—H) <sub>iph</sub> ; γ(C3—H) <sub>oph</sub> ; γ(C4—H) <sub>oph</sub>    |

|      |          |          |     |     |                                                                                                                                  |
|------|----------|----------|-----|-----|----------------------------------------------------------------------------------------------------------------------------------|
| v 42 | 843 (s)  |          | 839 | 112 | $\gamma(\text{O1—H})_{\text{iph}}$ ; $\gamma(\text{C3—H})_{\text{iph}}$ ; $\gamma(\text{C4—H})_{\text{iph}}$                     |
| v 43 |          |          | 811 | 9   | $\gamma(\text{O1—H})$ ; $\gamma(\text{C—H})_{\text{iph}}$ ; $\gamma(\text{C8—C9—C10})$                                           |
| v 44 | 788 (m)  | 787 (56) | 805 | 10  | $\gamma(\text{O1—H})$ ; $\gamma(\text{C6—H})$ ; $\gamma(\text{C7—C8—C9})$                                                        |
| v 45 |          | 745 (26) | 757 | 7   | $\gamma(\text{C8—C9—C10})$ ; $\gamma(\text{C1—C2—C3})$ ; $\delta(\text{C4—H})_{\text{iph}}$ ; $\delta(\text{C6—H})_{\text{oph}}$ |
| v 46 | 742 (s)  |          | 748 | 18  | $\delta_{\text{s}}(\text{CF}_3)$                                                                                                 |
| v 47 | 700 (w)  |          | 725 | 39  | $\gamma(\text{N2—H})$                                                                                                            |
| v 48 |          | 684 (42) | 697 | 10  | $\gamma(\text{C1—C7—C8})$ ; $\gamma(\text{C3—H})$ ; $\gamma(\text{N2—H})$                                                        |
| v 49 | 680 (s)  |          | 694 | 26  | $\delta(\text{C1—C6—C5})$ ; $\delta(\text{C2—C3—C4})$                                                                            |
| v 50 |          | 607 (8)  | 613 | 5   | $\gamma(\text{N2—H})$ ; $\delta(\text{C1—C7—C8})$                                                                                |
| v 51 | 579 (vw) | 581 (46) | 578 | 17  | $\gamma(\text{N2—H})$                                                                                                            |
| v 52 |          |          | 564 | 30  | $\gamma(\text{N2—H})$                                                                                                            |
| v 53 | 550 (vw) | 550 (45) | 551 | 2   | $\delta_{\text{as}}(\text{CF}_3)$                                                                                                |
| v 54 | 529 (m)  | 529 (13) | 538 | 5   | $\gamma(\text{C—H})_{\text{iph}}$                                                                                                |
| v 55 | 505 (w)  | 500 (42) | 513 | 6   | $\delta(\text{C1—C2—O1})$                                                                                                        |
| v 56 | 469 (vw) | 469 (43) | 472 | 3   | $\delta(\text{C1—C2—C3})$ ; $\delta(\text{C4—C5—C6})$                                                                            |
| v 57 |          |          | 447 | <1  | $\gamma(\text{C1—C2—C3})$ ; $\gamma(\text{C4—C5—C6})$                                                                            |
| v 58 | 430 (vw) | 430 (6)  | 442 | 8   | $\delta(\text{C7—O2})$                                                                                                           |
| v 59 | 406 (vw) | 400 (5)  | 426 | 2   | $\delta(\text{C8—C9—C10})$ ; $\delta(\text{C2—C1—C7})$                                                                           |
| v 60 |          |          | 403 | <1  | $\delta_{\text{as}}(\text{CF}_3)$                                                                                                |
| v 61 |          |          | 370 | 6   | $\rho_{\text{tw}}(\text{CF}_3)$ ; $\delta(\text{C2—C1—C7})$                                                                      |
| v 62 |          | 337 (28) | 339 | 1   | $\rho_{\text{tw}}(\text{CH}_3)$ ; $\gamma(\text{C2—C3—C4})$ ; $\gamma(\text{C1—C5—C6})$                                          |
| v 63 |          |          | 331 | 2   | $\rho_{\text{tw}}(\text{CH}_3)$                                                                                                  |
| v 64 |          | 257 (41) | 261 | 2   | $\rho_{\text{tw}}(\text{CH}_3)$                                                                                                  |
| v 65 |          | 244 (32) | 242 | 2   | $\rho_{\text{tw}}(\text{CF}_3)$ ; $\delta(\text{C7—C8—N3})$                                                                      |
| v 66 |          | 227 (20) | 225 | <1  | $\rho_{\text{tw}}(\text{CH}_3)$ ; $\gamma(\text{C7—C8—C9})$                                                                      |
| v 67 |          |          | 168 | <1  | $\gamma(\text{C8—C9—C10})$                                                                                                       |
| v 68 |          |          | 152 | <1  | $\rho_{\text{r}}(\text{CH}_3)$                                                                                                   |
| v 69 |          |          | 146 | <1  | $\gamma(\text{C7—O2})$                                                                                                           |
| v 70 |          |          | 126 | <1  | $\tau(\text{C2—C1—C7—C8})$                                                                                                       |
| v 71 |          |          | 95  | <1  | $\tau(\text{C1—C7—C8—C9})$                                                                                                       |
| v 72 |          |          | 84  | <1  | $\rho_{\text{r}}(\text{CH}_3)$                                                                                                   |
| v 73 |          |          | 56  | <1  | $\rho_{\text{r}}(\text{CF}_3)$                                                                                                   |
| v 74 |          |          | 38  | <1  | $\tau(\text{C2—C1—C7—C8})$                                                                                                       |
| v 75 |          |          | 16  | <1  | $\tau(\text{C1—C7—C8—C9})$                                                                                                       |

<sup>[a]</sup>In  $\text{cm}^{-1}$  <sup>[b]</sup>B3LYP 6-31g (d,p) <sup>[c]</sup>vs, very strong; s, strong; m, medium; w, weak; sh, shoulder. <sup>[d]</sup>Intensity (arbitrary units). <sup>[e]</sup>Intensity (km/mol) <sup>[f]</sup>v,  $\delta$ ,  $\gamma$ ,  $\tau$ ,  $\rho_{\text{r}}$ ,  $\rho_{\text{tw}}$  and  $\rho_{\text{wag}}$  represent stretching, in plane deformation, out-of-plane deformation, torsion, rocking, wagging and twisting modes. Iph and oph represent in phase and out-of-phase modes, respectively.

**Table S13** Experimental and calculated frequencies and tentative assignment of fundamental vibration modes of **4**.

| Mode            | Experimental <sup>[a]</sup> |                      | Calculated <sup>[b]</sup> |                    | Assignment <sup>[f]</sup>                                                   |
|-----------------|-----------------------------|----------------------|---------------------------|--------------------|-----------------------------------------------------------------------------|
|                 | IR <sup>[c]</sup>           | Raman <sup>[d]</sup> | Freq <sup>[a]</sup>       | Int <sup>[e]</sup> |                                                                             |
| v <sub>1</sub>  |                             |                      | 3658                      | 147                | v(N2—H)                                                                     |
| v <sub>2</sub>  | 3334 (s)                    |                      | 3292                      | 330                | v(O1—H)                                                                     |
| v <sub>3</sub>  | 3109 (vw)                   |                      | 3261                      | 9                  | v(C6—H)                                                                     |
| v <sub>4</sub>  |                             |                      | 3227                      | 2                  | v(C3—H)                                                                     |
| v <sub>5</sub>  |                             | 2921 (26)            | 3213                      | 2                  | v(C4—H)                                                                     |
| v <sub>6</sub>  | 1623 (m)                    | 1622 (100)           | 1691                      | 196                | v(C7—O2); δ(C2—O1—H); v(C—C)                                                |
| v <sub>7</sub>  | 1601 (m)                    | 1603 (4)             | 1654                      | 65                 | v(C7—O2)                                                                    |
| v <sub>8</sub>  | 1560 (vw)                   | 1568 (28)            | 1621                      | 89                 | δ(C2—O1—H)                                                                  |
| v <sub>9</sub>  | 1524 (w)                    | 1520 (12)            | 1561                      | 33                 | δ(N2—H); v(C9—N1)                                                           |
| v <sub>10</sub> | 1497 (vw)                   |                      | 1531                      | 46                 | v(C8—C9)                                                                    |
| v <sub>11</sub> | 1460 (m)                    | 1459 (17)            | 1516                      | 218                | δ(O2—H); δ(C—H) <sub>iph</sub>                                              |
| v <sub>12</sub> | 1427 (m)                    |                      | 1460                      | 134                | δ(N2—H)                                                                     |
| v <sub>13</sub> |                             | 1403 (24)            | 1458                      | 14                 | δ(C1—C6—C5)                                                                 |
| v <sub>14</sub> | 1357 (vw)                   | 1355 (4)             | 1423                      | 98                 | δ(O1—H); δ(C6—H)                                                            |
| v <sub>15</sub> |                             | 1335 (25)            | 1379                      | 48                 | v(C8—C9)                                                                    |
| v <sub>16</sub> | 1341 (w)                    |                      | 1372                      | 138                | v(C8—N3)                                                                    |
| v <sub>17</sub> | 1310 (w)                    |                      | 1345                      | 76                 | v(C2—O1); δ(C—H) <sub>iph</sub>                                             |
| v <sub>18</sub> | 1264 (w)                    |                      | 1313                      | 90                 | δ(C2—O1—H); v(C1—C6); δ(C6—H); v <sub>as</sub> (N1—N2—N3)                   |
| v <sub>19</sub> | 1193 (m)                    |                      | 1274                      | 75                 | v(C1—C7); δ(C6—H) <sub>iph</sub> ; δ(C3—H) <sub>oph</sub>                   |
| v <sub>20</sub> | 1173 (m)                    |                      | 1239                      | 165                | δ(C3—H) <sub>iph</sub> ; δ(C6—H) <sub>iph</sub> ; v <sub>s</sub> (N1—N2—N3) |
| v <sub>21</sub> |                             |                      | 1230                      | 152                | v(N2—N3)                                                                    |
| v <sub>22</sub> | 1159 (m)                    |                      | 1219                      | 256                | v <sub>as</sub> (CF <sub>3</sub> )                                          |
| v <sub>23</sub> |                             |                      | 1209                      | 3                  | v <sub>as</sub> (CF <sub>3</sub> )                                          |
| v <sub>24</sub> | 1128 (m)                    | 1129 (16)            | 1184                      | 87                 | v(N1—N2)                                                                    |
| v <sub>25</sub> |                             |                      | 1157                      | 11                 | δ(C3—H) <sub>iph</sub> ; δ(C4—H) <sub>oph</sub>                             |
| v <sub>26</sub> | 1097 (vw)                   | 1093 (11)            | 1120                      | 39                 | v(C5—Cl)                                                                    |
| v <sub>27</sub> | 1075 (m)                    | 1069 (2)             | 1092                      | 208                | v <sub>s</sub> (CF <sub>3</sub> )                                           |
| v <sub>28</sub> | 991 (w)                     |                      | 1009                      | 14                 | δ(C8—N3—N2); δ(C9—N1—N2)                                                    |
| v <sub>29</sub> |                             |                      | 975                       | 0                  | γ(C3—H) <sub>iph</sub> ; γ(C4—H) <sub>oph</sub>                             |
| v <sub>30</sub> | 938 (m)                     | 932 (1)              | 949                       | 85                 | δ(C4—C5—C6)                                                                 |
| v <sub>31</sub> | 879 (vw)                    |                      | 908                       | 6                  | γ(C6—H)                                                                     |
| v <sub>32</sub> |                             |                      | 855                       | 15                 | γ(O1—H) <sub>oph</sub> ; γ(C3—H) <sub>iph</sub> ; γ(C4—H) <sub>iph</sub>    |
| v <sub>33</sub> |                             |                      | 844                       | 36                 | δ(C4—C5—C6); δ(C4—H) <sub>iph</sub> ; δ(C6—H) <sub>iph</sub>                |
| v <sub>34</sub> | 824 (w)                     | 822 (35)             | 841                       | 110                | γ(O1—H); γ(C3—H) <sub>iph</sub> ; γ(C4—H) <sub>iph</sub>                    |
| v <sub>35</sub> |                             |                      | 807                       | 3                  | γ(O1—H); δ(C—H) <sub>iph</sub> ; γ(C7—C8—C9)                                |
| v <sub>36</sub> | 749 (w)                     | 750 (17)             | 764                       | 17                 | δ(C2—C1—C7); δ <sub>s</sub> (CF <sub>3</sub> )                              |
| v <sub>37</sub> |                             |                      | 748                       | 27                 | γ(O1—H); γ(C—H) <sub>oph</sub> ; γ(C8—C9—C10)                               |
| v <sub>38</sub> | 741 (m)                     |                      | 744                       | 60                 | δ <sub>s</sub> (CF <sub>3</sub> )                                           |
| v <sub>39</sub> | 695 (vw)                    |                      | 725                       | 39                 | γ(N2—H)                                                                     |
| v <sub>40</sub> | 667 (vw)                    | 671 (14)             | 689                       | 7                  | γ(C1—C7—C8); γ(C3—H); γ(N2—H)                                               |
| v <sub>41</sub> | 645 (w)                     | 646 (6)              | 659                       | 23                 | δ(C1—C6—C5); δ(C2—C3—C4)                                                    |

|      |          |          |     |    |                                                                                               |
|------|----------|----------|-----|----|-----------------------------------------------------------------------------------------------|
| v 42 | 598 (vw) | 604 (9)  | 611 | 7  | $\gamma(\text{N2—H}); \delta(\text{C1—C7—C8})$                                                |
| v 43 | 579 (vw) | 573 (16) | 580 | 37 | $\gamma(\text{N2—H})$                                                                         |
| v 44 |          |          | 568 | 5  | $\gamma(\text{N2—H}); \delta_{\text{as}}(\text{CF}_3); \gamma(\text{N1—N2—N3})$               |
| v 45 |          | 549 (25) | 550 | 1  | $\delta_{\text{as}}(\text{CF}_3)$                                                             |
| v 46 | 526 (vw) | 529 (3)  | 531 | 7  | $\gamma(\text{C—H})_{\text{iph}}$                                                             |
| v 47 | 504 (vw) | 501 (40) | 512 | 6  | $\delta(\text{C1—C2—O1})$                                                                     |
| v 48 |          |          | 446 | 0  | $\gamma(\text{C2—C1—C6}); \gamma(\text{C3—H})_{\text{iph}}; \gamma(\text{C6—H})_{\text{iph}}$ |
| v 49 | 433 (vw) | 432 (9)  | 444 | 9  | $\delta(\text{C7—O2})$                                                                        |
| v 50 | 408 (vw) | 404 (2)  | 427 | 2  | $\delta(\text{C8—C9—C10}); \delta(\text{C2—C1—C7})$                                           |
| v 51 |          |          | 404 | <1 | $\delta(\text{CF}_3)$                                                                         |
| v 52 |          | 373 (11) | 376 | 2  | $\delta(\text{C1—C2—C3}); \delta(\text{C4—C4—C5})$                                            |
| v 53 |          | 364 (7)  | 369 | 4  | $\rho_{\text{wag}}(\text{CF}_3); \delta(\text{C2—C1—C7})$                                     |
| v 54 |          | 337 (14) | 335 | <1 | $\gamma(\text{C1—C2—C3}); \delta(\text{C4—C5—C6})$                                            |
| v 55 |          | 304 (5)  | 310 | 1  | $\delta(\text{C2—C1—C7}); \delta(\text{C5—C1})$                                               |
| v 56 |          |          | 258 | 1  | $\delta(\text{C7—C8—N3})$                                                                     |
| v 57 |          |          | 238 | 2  | $\rho_{\text{tw}}(\text{CF}_3)$                                                               |
| v 58 |          |          | 211 | 1  | $\gamma(\text{C7—C8—C9})$                                                                     |
| v 59 |          |          | 163 | <1 | $\gamma(\text{C8—C9—C10})$                                                                    |
| v 60 |          | 148 (8)  | 146 | <1 | $\gamma(\text{C7—O2})$                                                                        |
| v 61 |          |          | 131 | <1 | $\tau(\text{C2—C1—C7—C8})$                                                                    |
| v 62 |          | 122 (50) | 121 | <1 | $\tau(\text{C1—C7—C8—C9})$                                                                    |
| v 63 |          |          | 87  | <1 | $\rho_{\text{r}}(\text{CF}_3)$                                                                |
| v 64 |          |          | 61  | <1 | $\rho_{\text{r}}(\text{CF}_3)$                                                                |
| v 65 |          |          | 37  | <1 | $\tau(\text{C2—C1—C7—C8})$                                                                    |
| v 66 |          |          | 15  | <1 | $\tau(\text{C1—C7—C8—C9})$                                                                    |

[a]In  $\text{cm}^{-1}$  [b]B3LYP 6-31g (d,p) [c]vs, very strong; s, strong; m, medium; w, weak; sh, shoulder. [d]Intensity (arbitrary units). [e]Intensity (km/mol) [f]v,  $\delta$ ,  $\gamma$ ,  $\tau$ ,  $\rho_{\text{r}}$ ,  $\rho_{\text{tw}}$  and  $\rho_{\text{wag}}$  represent stretching, in plane deformation, out-of-plane deformation, torsion, rocking, wagging and twisting modes. Iph and oph represent in phase and out-of-phase modes, respectively.

**Table S14.** Experimental and calculated electronic spectra (in nm) for **1 – 4**, and tentative assignment of the absorption bands.

| Comp.    | Exp. <sup>a, b</sup> | Calc. <sup>a, c</sup> | $f^d$  | Assignment    | %   |
|----------|----------------------|-----------------------|--------|---------------|-----|
| <b>1</b> | 212                  | 201                   | 0,2240 | HOMO-3 → LUMO | 30  |
|          |                      |                       |        | HOMO-1 → LUMO | 32  |
|          | 269                  | 207                   | 0,1183 | HOMO-3 → LUMO | 74  |
|          |                      | 249                   | 0,2232 | HOMO-1 → LUMO | 94  |
|          |                      | 314                   | 0,1305 | HOMO → LUMO   | 100 |
| <b>2</b> | 250                  | 242                   | 0,3539 | HOMO-1 → LUMO | 82  |
|          | 322                  | 299                   | 0,0756 | HOMO → LUMO   | 74  |
| <b>3</b> | 217                  | 208                   | 0,1689 | HOMO-3 → LUMO | 38  |
|          | 271                  | 251                   | 0,2130 | HOMO-1 → LUMO | 92  |
|          | 369                  | 326                   | 0,1236 | HOMO → LUMO   | 100 |
| <b>4</b> | 221                  | 205                   | 0,1656 | HOMO-3 → LUMO | 47  |
|          |                      | 212                   | 0,1681 | HOMO-3 → LUMO | 45  |
|          | 268                  | 247                   | 0,1820 | HOMO-1 → LUMO | 86  |
|          | 372                  | 328                   | 0,1207 | HOMO → LUMO   | 100 |

<sup>a</sup>In nm. <sup>b</sup>Diffuse Reflectance. <sup>c</sup>CAM-B3LYP/6-31+g (d,p). <sup>d</sup>Oscillator strength in atomic units.

**Table S15.** Calculated frontier MO energies and  $\Delta$ HOMO-LUMO gaps (eV) for **1 – 4**.

|          | HOMO    | LUMO    | $\Delta E_{H-L}$ CAM-B3LYP/<br>6-31+g(d,p) | $\Delta E_{H-L}$ B3LYP/<br>6-31g(d,p) |
|----------|---------|---------|--------------------------------------------|---------------------------------------|
| <b>1</b> | -8.1030 | -1.4838 | 6.62                                       | 3.94                                  |
| <b>2</b> | -8.9003 | -2.0417 | 6.86                                       | 4.17                                  |
| <b>3</b> | -7.8510 | -1.4232 | 6.43                                       | 3.78                                  |
| <b>4</b> | -8.0989 | -1.7388 | 6.36                                       | 3.74                                  |

**Table S16.** Natural Population Analysis for **1** and **4**.

| Atom   | NPA          |        |            |        |        |        |
|--------|--------------|--------|------------|--------|--------|--------|
|        | Monomers DRX |        | Dimers DRX |        |        |        |
|        | 1            | 4      | 1          |        | 4      |        |
|        |              |        | #1         | #2     | #1     | #2     |
| C1     | -0.233       | -0.216 | -0.233     | -0.235 | -0.214 | -0.220 |
| C2     | 0.414        | 0.408  | 0.413      | 0.417  | 0.408  | 0.414  |
| C3     | -0.238       | -0.212 | -0.242     | -0.237 | -0.214 | -0.205 |
| C4     | -0.126       | -0.135 | -0.130     | -0.120 | -0.138 | -0.129 |
| C5     | -0.210       | -0.057 | -0.210     | -0.207 | -0.056 | -0.056 |
| C6     | -0.121       | -0.149 | -0.115     | -0.118 | -0.145 | -0.148 |
| C7     | 0.537        | 0.536  | 0.538      | 0.553  | 0.538  | 0.554  |
| C8     | 0.074        | 0.070  | 0.071      | 0.072  | 0.066  | 0.069  |
| C9     | 0.039        | 0.033  | 0.034      | 0.037  | 0.029  | 0.030  |
| C10    | 1.158        | 1.159  | 1.157      | 1.157  | 1.159  | 1.158  |
| O1     | -0.655       | -0.612 | -0.658     | -0.655 | -0.614 | -0.604 |
| H-(OH) | 0.485        | 0.453  | 0.485      | 0.489  | 0.454  | 0.455  |
| O2     | -0.596       | -0.586 | -0.599     | -0.641 | -0.589 | -0.637 |
| N1     | -0.247       | -0.240 | -0.246     | -0.241 | -0.239 | -0.235 |
| N2     | -0.038       | -0.098 | -0.029     | -0.034 | -0.092 | -0.094 |
| H-(NH) | 0.354        | 0.407  | 0.368      | 0.356  | 0.424  | 0.410  |
| N3     | -0.271       | -0.265 | -0.282     | -0.265 | -0.279 | -0.259 |
| F1     | -0.363       | -0.362 | -0.365     | -0.366 | -0.364 | -0.367 |
| F2     | -0.365       | -0.367 | -0.367     | -0.369 | -0.369 | -0.369 |
| F3     | -0.364       | -0.363 | -0.365     | -0.358 | -0.364 | -0.357 |
| H(C3)  | 0.199        | 0.200  | 0.197      | 0.200  | 0.199  | 0.204  |
| H(C4)  | 0.185        | 0.188  | 0.183      | 0.187  | 0.186  | 0.189  |
| H(C5)  | 0.182        |        | 0.180      | 0.184  |        |        |
| H(C6)  | 0.203        | 0.216  | 0.205      | 0.204  | 0.217  | 0.216  |
| Cl     |              | -0.008 |            |        | -0.015 | -0.005 |

**Table S17.** Natural Population Analysis for 2.

| Atom  | NPA         |            |        |        |        |
|-------|-------------|------------|--------|--------|--------|
|       | Monomer DRX | Dimers DRX |        |        |        |
|       |             | I          |        | II     |        |
|       |             | #1         | #2     | #1     | #2     |
| C1    | -0.220      | -0.220     | -0.220 | -0.216 | -0.216 |
| C2    | 0.433       | 0.432      | 0.433  | 0.436  | 0.436  |
| C3    | -0.236      | -0.231     | -0.236 | -0.234 | -0.234 |
| C4    | -0.086      | -0.084     | -0.085 | -0.088 | -0.088 |
| C5    | 0.062       | 0.064      | 0.063  | 0.058  | 0.058  |
| C6    | -0.051      | -0.054     | -0.051 | -0.044 | -0.044 |
| C7    | 0.548       | 0.550      | 0.549  | 0.551  | 0.551  |
| C8    | 0.061       | 0.062      | 0.063  | 0.052  | 0.052  |
| C9    | 0.046       | 0.046      | 0.045  | 0.043  | 0.043  |
| C10   | 1.161       | 1.161      | 1.163  | 1.160  | 1.160  |
| O3    | -0.665      | -0.681     | -0.665 | -0.663 | -0.663 |
| H-OH  | 0.506       | 0.505      | 0.506  | 0.507  | 0.507  |
| O4    | -0.586      | -0.591     | -0.587 | -0.586 | -0.586 |
| N3    | -0.260      | -0.261     | -0.259 | -0.260 | -0.260 |
| N2    | -0.002      | -0.001     | 0.006  | 0.012  | 0.012  |
| H-NH  | 0.327       | 0.327      | 0.329  | 0.335  | 0.335  |
| N4    | -0.245      | -0.245     | -0.254 | -0.244 | -0.244 |
| F1    | -0.362      | -0.362     | -0.360 | -0.364 | -0.364 |
| F2    | -0.361      | -0.362     | -0.359 | -0.363 | -0.363 |
| F3    | -0.364      | -0.364     | -0.371 | -0.364 | -0.364 |
| H(C3) | 0.222       | 0.232      | 0.222  | 0.223  | 0.223  |
| H(C4) | 0.177       | 0.177      | 0.177  | 0.177  | 0.177  |
| H(C6) | 0.168       | 0.168      | 0.168  | 0.171  | 0.171  |
| N1    | 0.506       | 0.506      | 0.506  | 0.514  | 0.514  |
| O1    | -0.391      | -0.391     | -0.390 | -0.425 | -0.425 |
| O2    | -0.388      | -0.387     | -0.388 | -0.389 | -0.389 |

**Table S18.** Natural Population Analysis of **3**.

| Atom | Monomer DRX | NPA        |        |
|------|-------------|------------|--------|
|      |             | Dimers DRX |        |
|      |             | 1          |        |
|      |             | #1         | #2     |
| C1   | -0,218      | -0,217     |        |
| C2   | 0,404       | 0,401      |        |
| C3   | -0,217      | -0,218     |        |
| C4   | -0,124      | -0,122     |        |
| C5   | -0,032      | -0,028     |        |
| C6   | -0,127      | -0,132     |        |
| C7   | 0,539       | 0,541      |        |
| C8   | 0,074       | 0,076      |        |
| C9   | 0,033       | 0,031      |        |
| C10  | 1,161       | 1,161      |        |
| O1   | -0,651      | -0,674     |        |
| H-OH | 0,475       | 0,481      |        |
| O2   | -0,592      | -0,589     |        |
| N1   | -0,248      | -0,245     |        |
| N2   | -0,052      | -0,040     |        |
| H-NH | 0,361       | 0,386      |        |
| N3   | -0,270      | -0,313     |        |
| F1   | -0,363      | -0,364     |        |
| F2   | -0,367      | -0,368     |        |
| F3   | -0,363      | -0,363     |        |
| H3   | 0,187       | 0,183      |        |
| H4   | 0,172       | 0,174      |        |
| H5   | 0,000       |            |        |
| H6   | 0,181       | 0,182      |        |
| C11  | -0,544      | -0,544     |        |
| H11A | 0,196       | 0,197      |        |
| H11B | 0,193       | 0,193      |        |
| H11C | 0,191       | 0,195      |        |
| O1   |             |            | -0,843 |
| H1A  |             |            | 0,443  |
| H1B  |             |            | 0,422  |
| O2   |             |            | -0,843 |
| H2A  |             |            | 0,432  |
| H2B  |             |            | 0,406  |
| O3   |             |            | -0,832 |
| H3A  |             |            | 0,415  |
| H3B  |             |            | 0,414  |



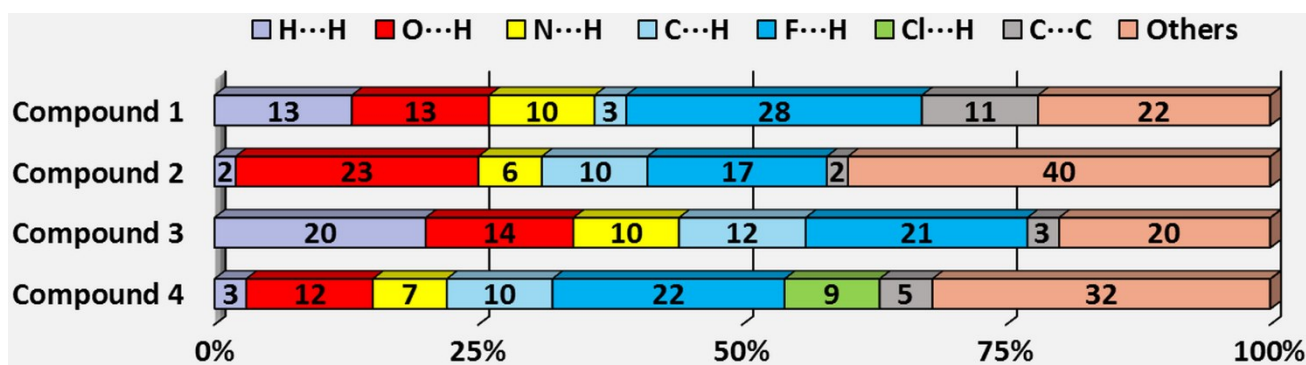

**FigureS1.** Relative contributions of selected intermolecular contacts to the Hirshfeld surface area for structures 1 – 4. Percentages are given on the histogram.

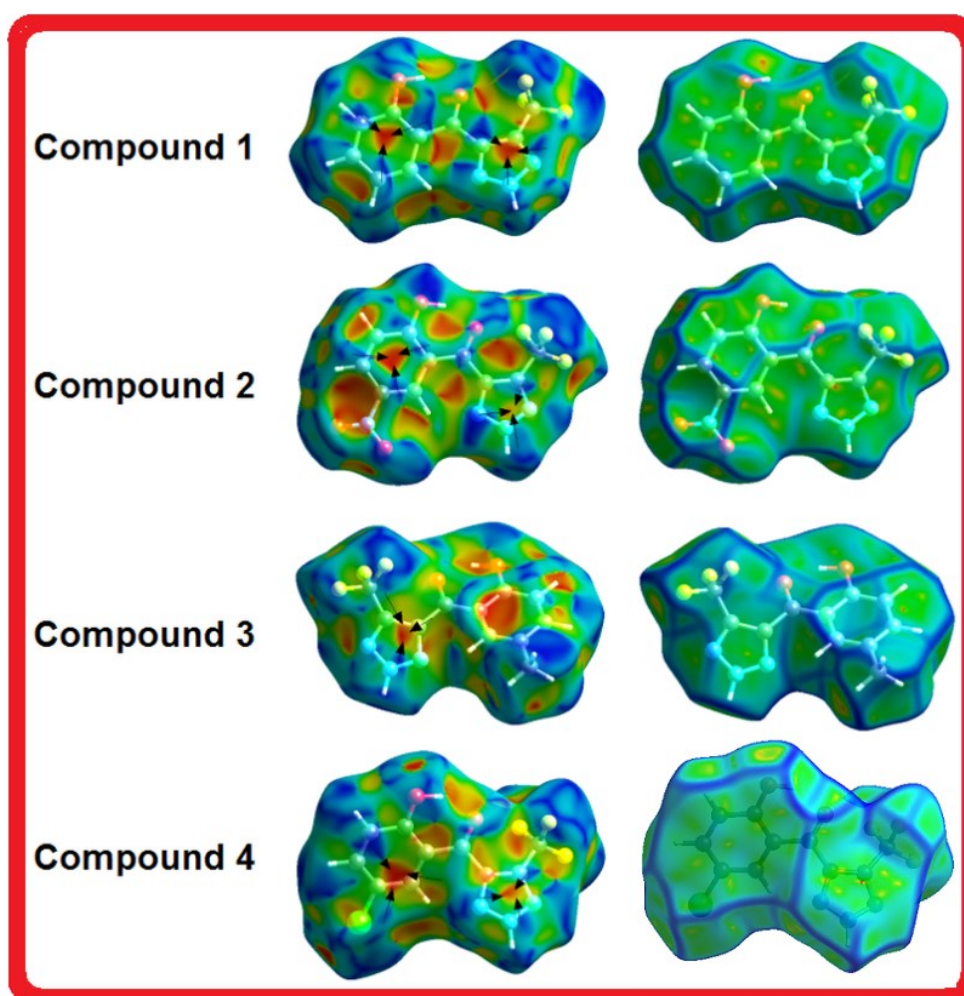

**Figure S2.** Hirshfeld surfaces for 1-4, mapped over: (a) shape index, highlighting the regions involved in  $\pi$ -stacking interactions, and (b) curvedness.

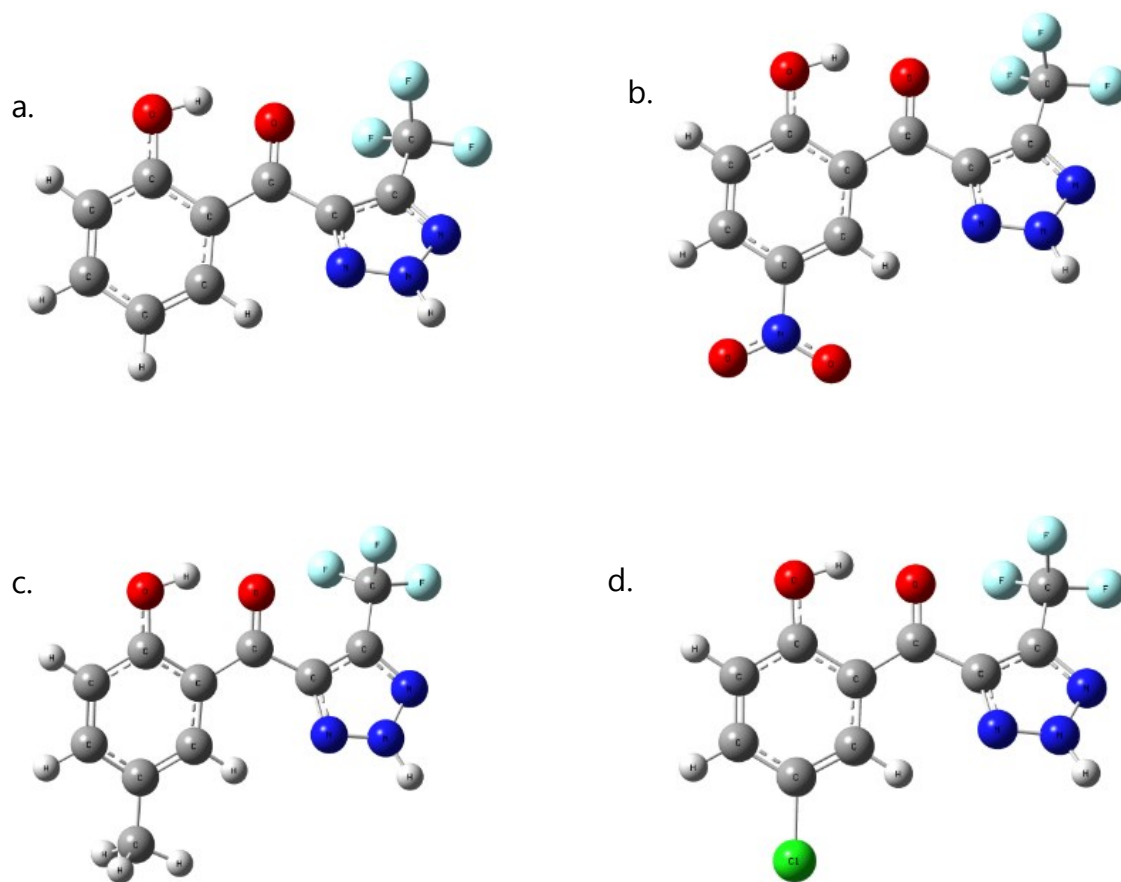

**Figure S3.** Optimized geometries calculated with B3LYP 6-31g(d,p): a. **1**. b. **2**. c. **3** and d. **4**.

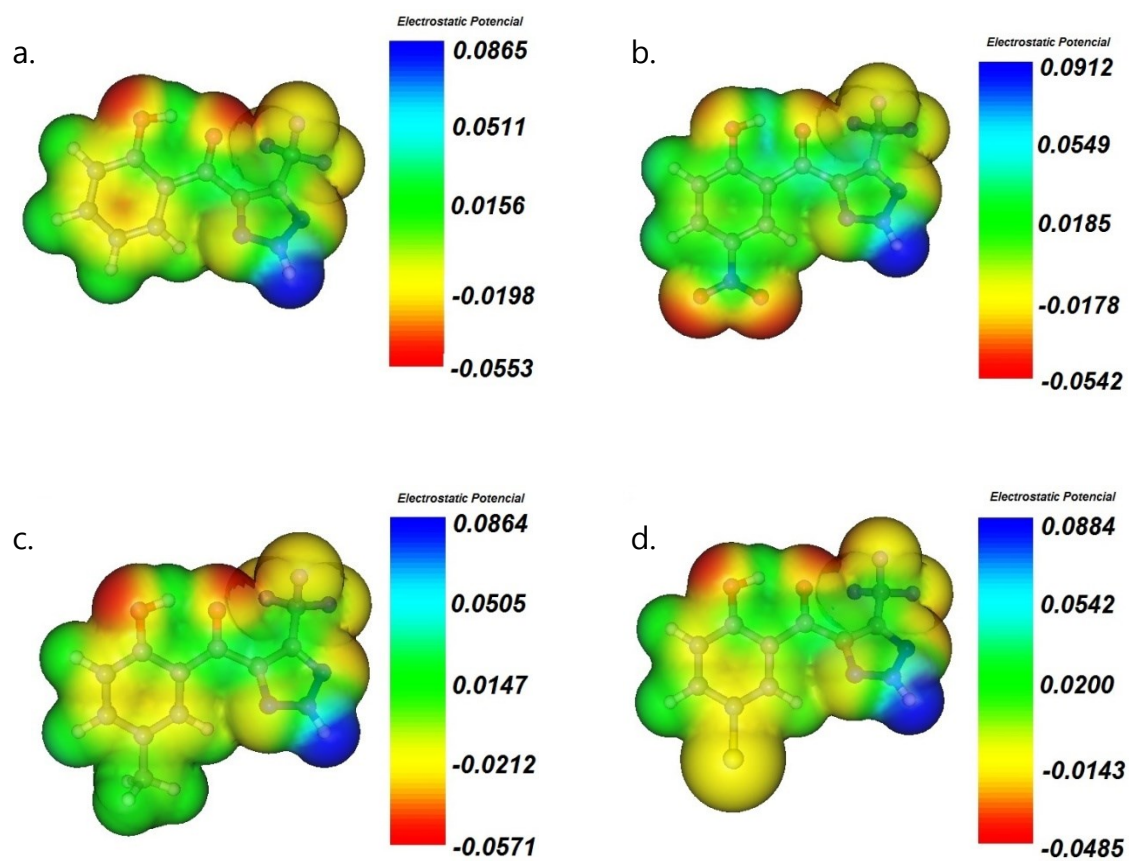

**Figure S4.** Molecular electrostatic potential maps (MEPs) calculated with B3LYP 6-31g(d,p):  
a. 1. b. 2. c. 3 and d. 4.

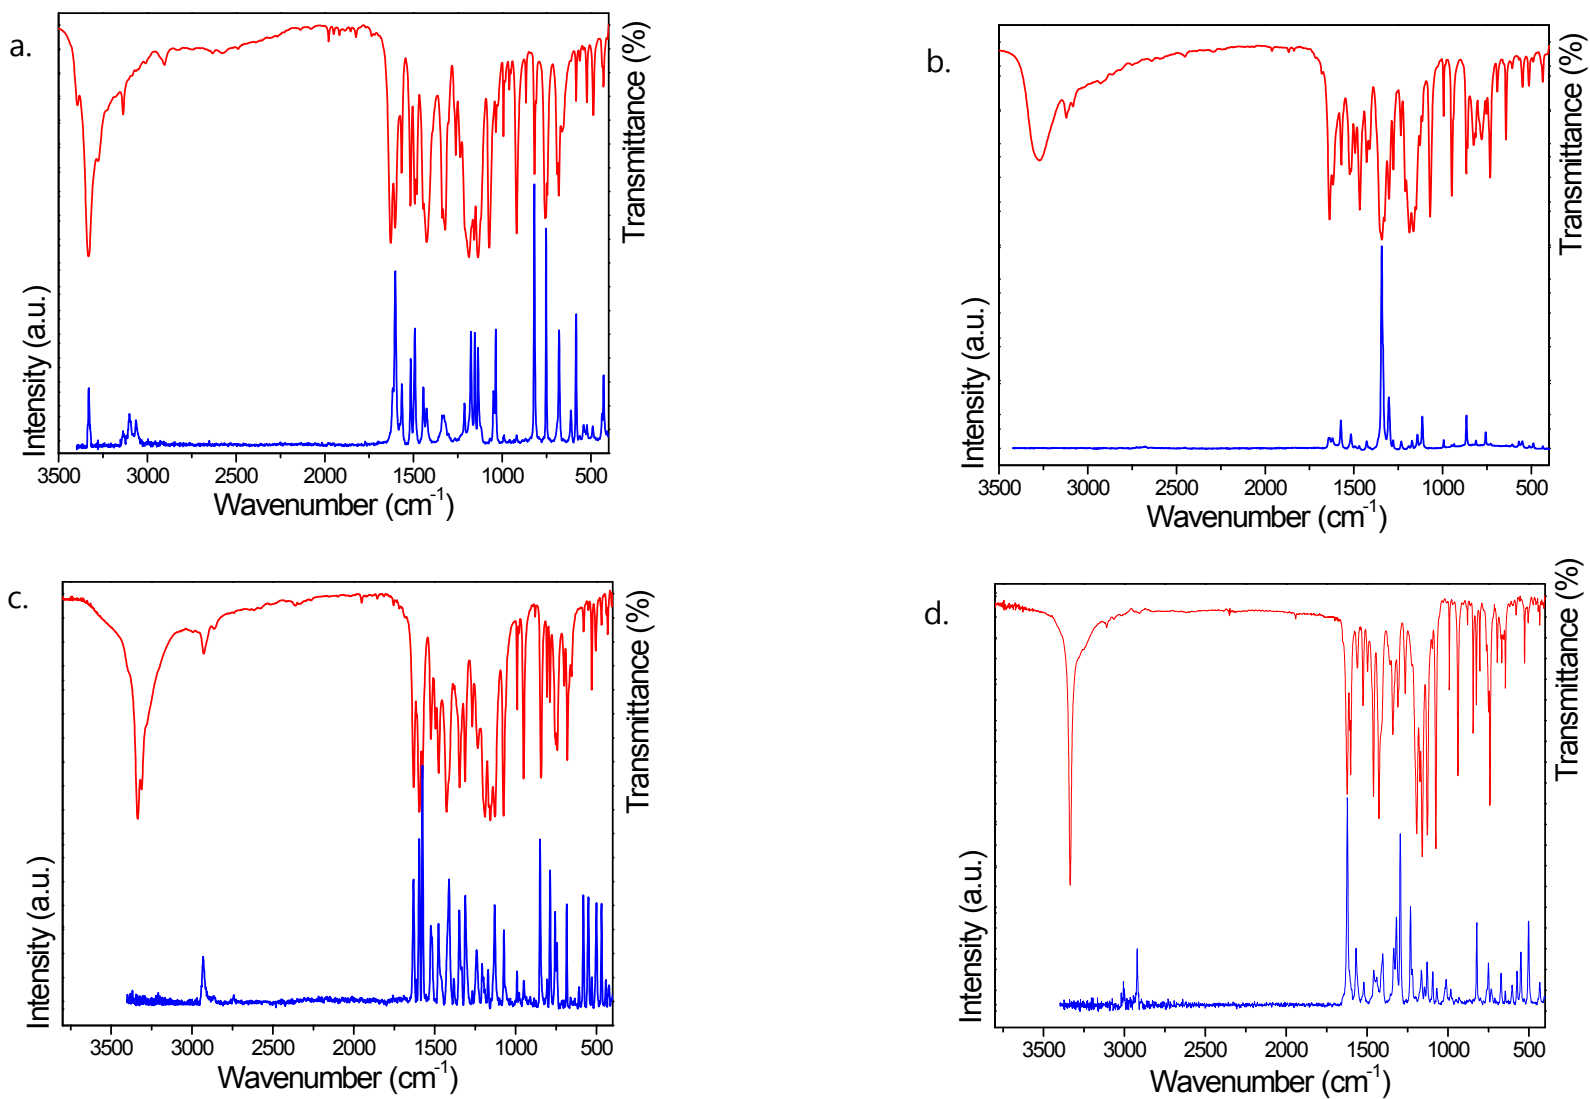

**FigureS5.** Infrared (upper trace, KBr pellets) and Raman (lower trace) spectra of the solid at room temperature of: a. **1.** b. **2.** c. **3** and d. **4.**

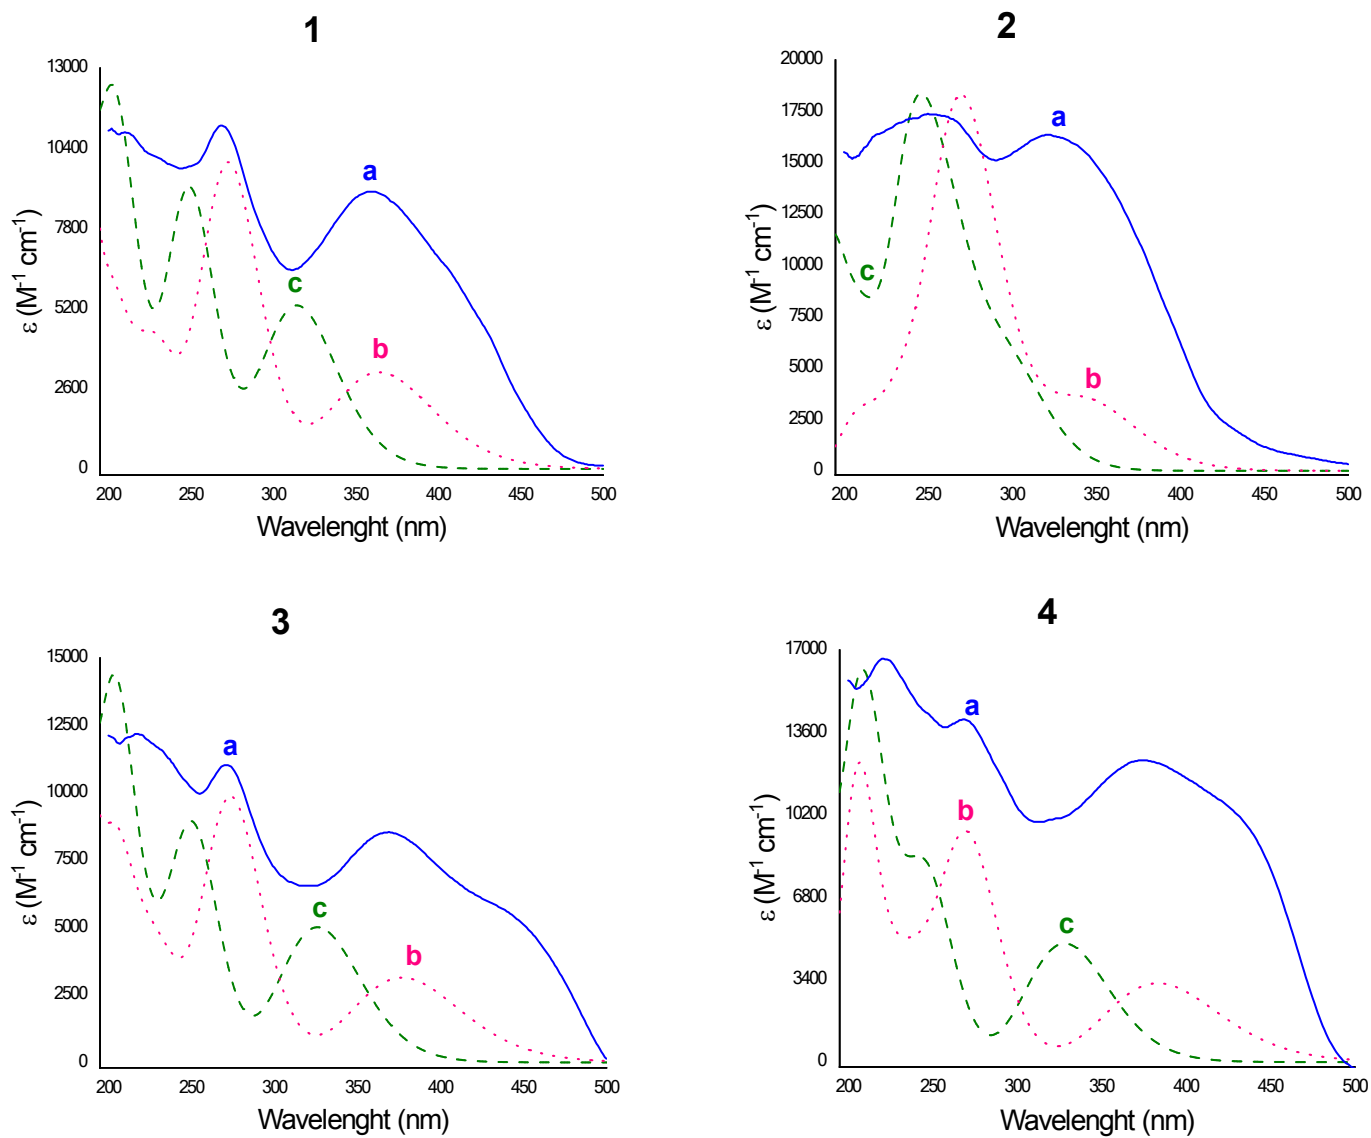

**FigureS6.** Electronic spectra of **1** – **4**: a) experimental; b) calculated at B3LYP/6-31g(d,p) level of theory; c) calculated at CAM-B3LYP/6-31+g(d,p) level of theory.

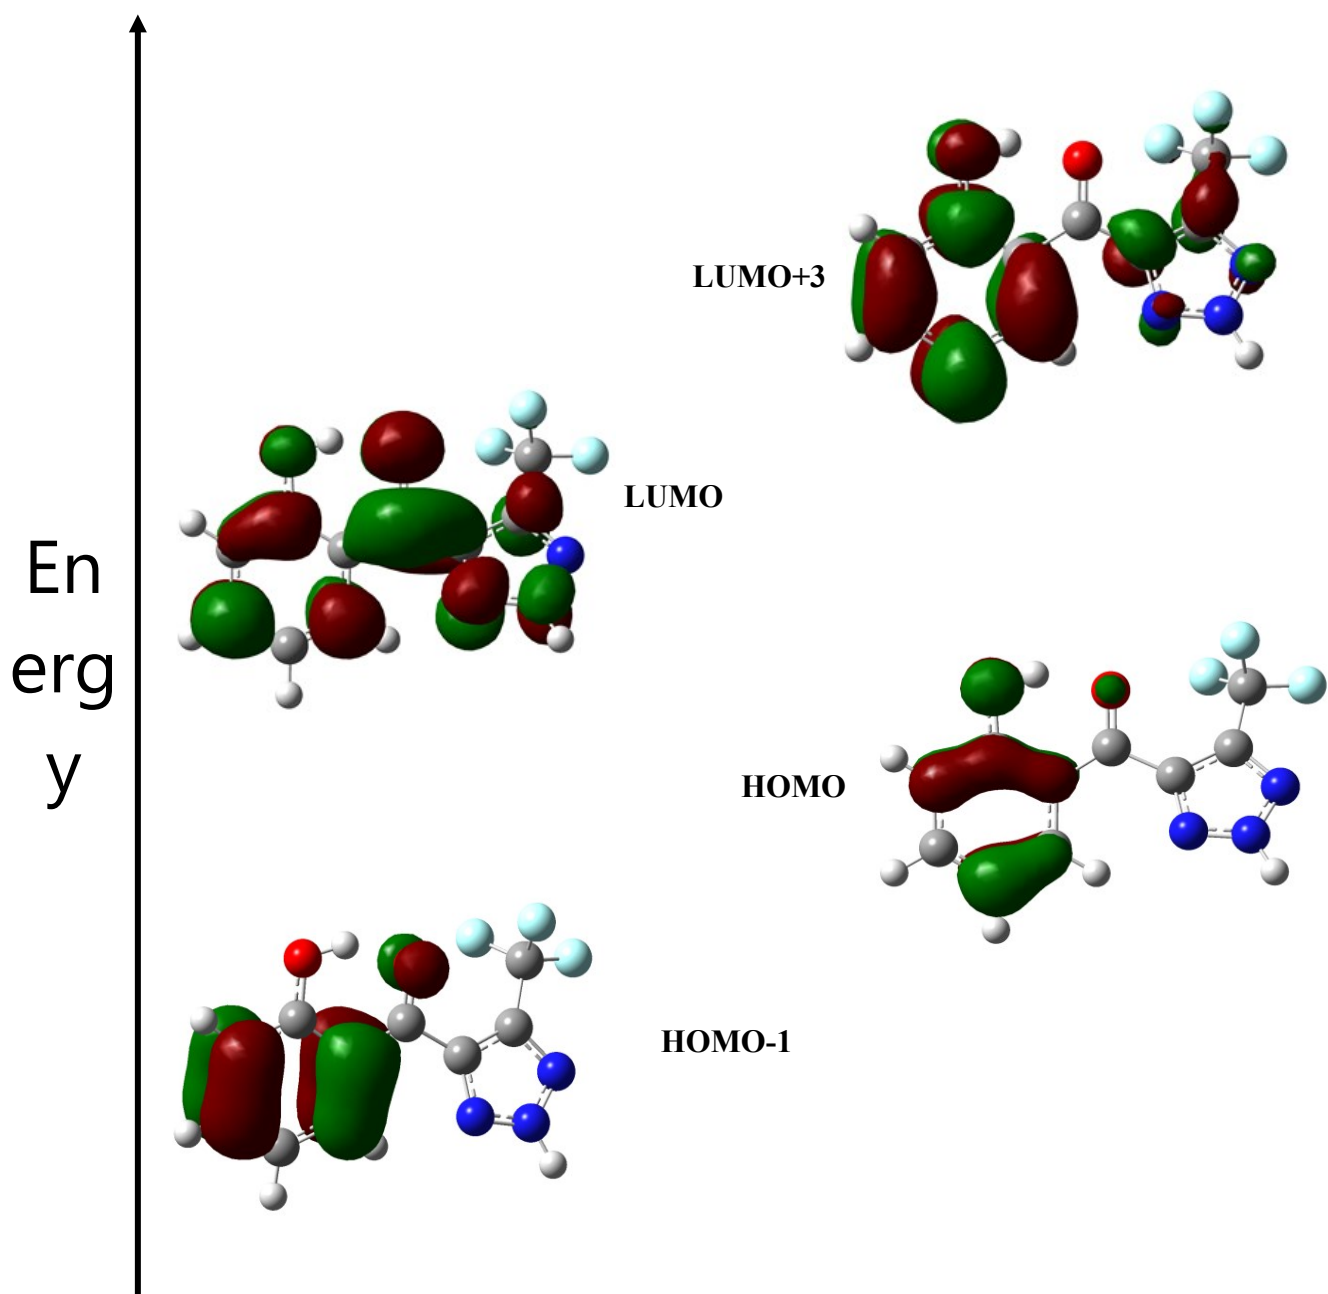

**Figure S7.** Molecular orbitals involved in the electronic transitions of **1**. The energy scale is only qualitative and does not represent the actual energy of the molecular orbitals.

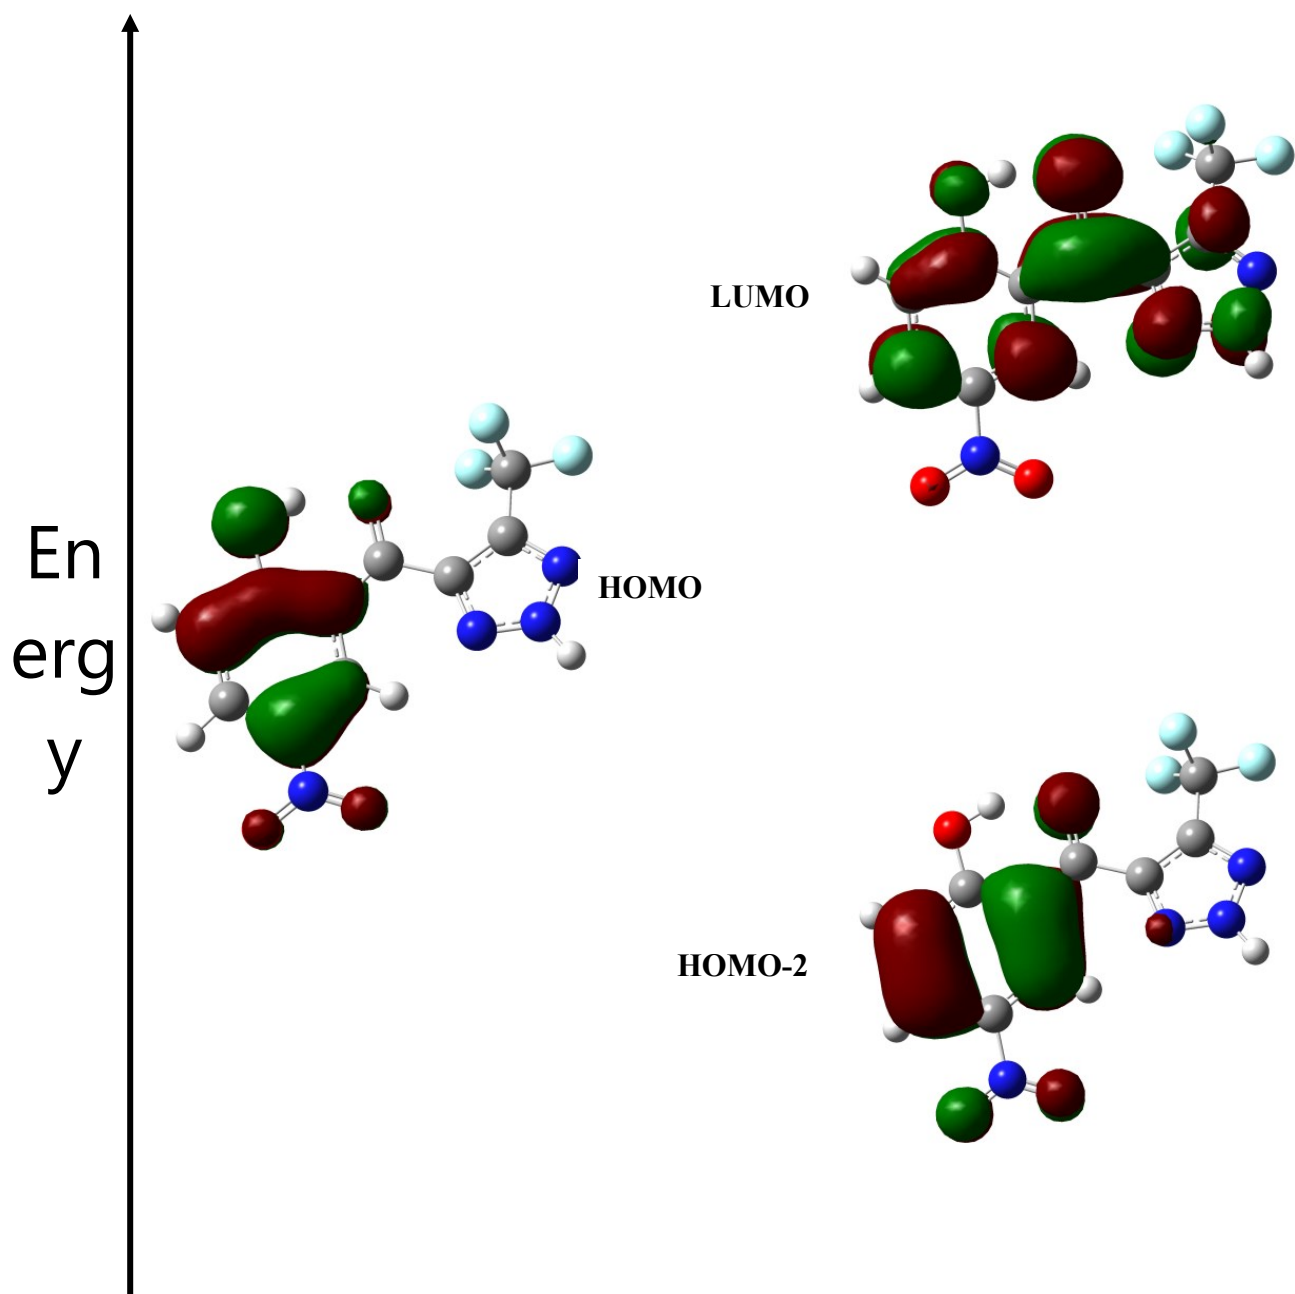

**Figure S8.** Molecular orbitals involved in the electronic transitions of **2**. The energy scale is only qualitative and does not represent the actual energy of the molecular orbitals.

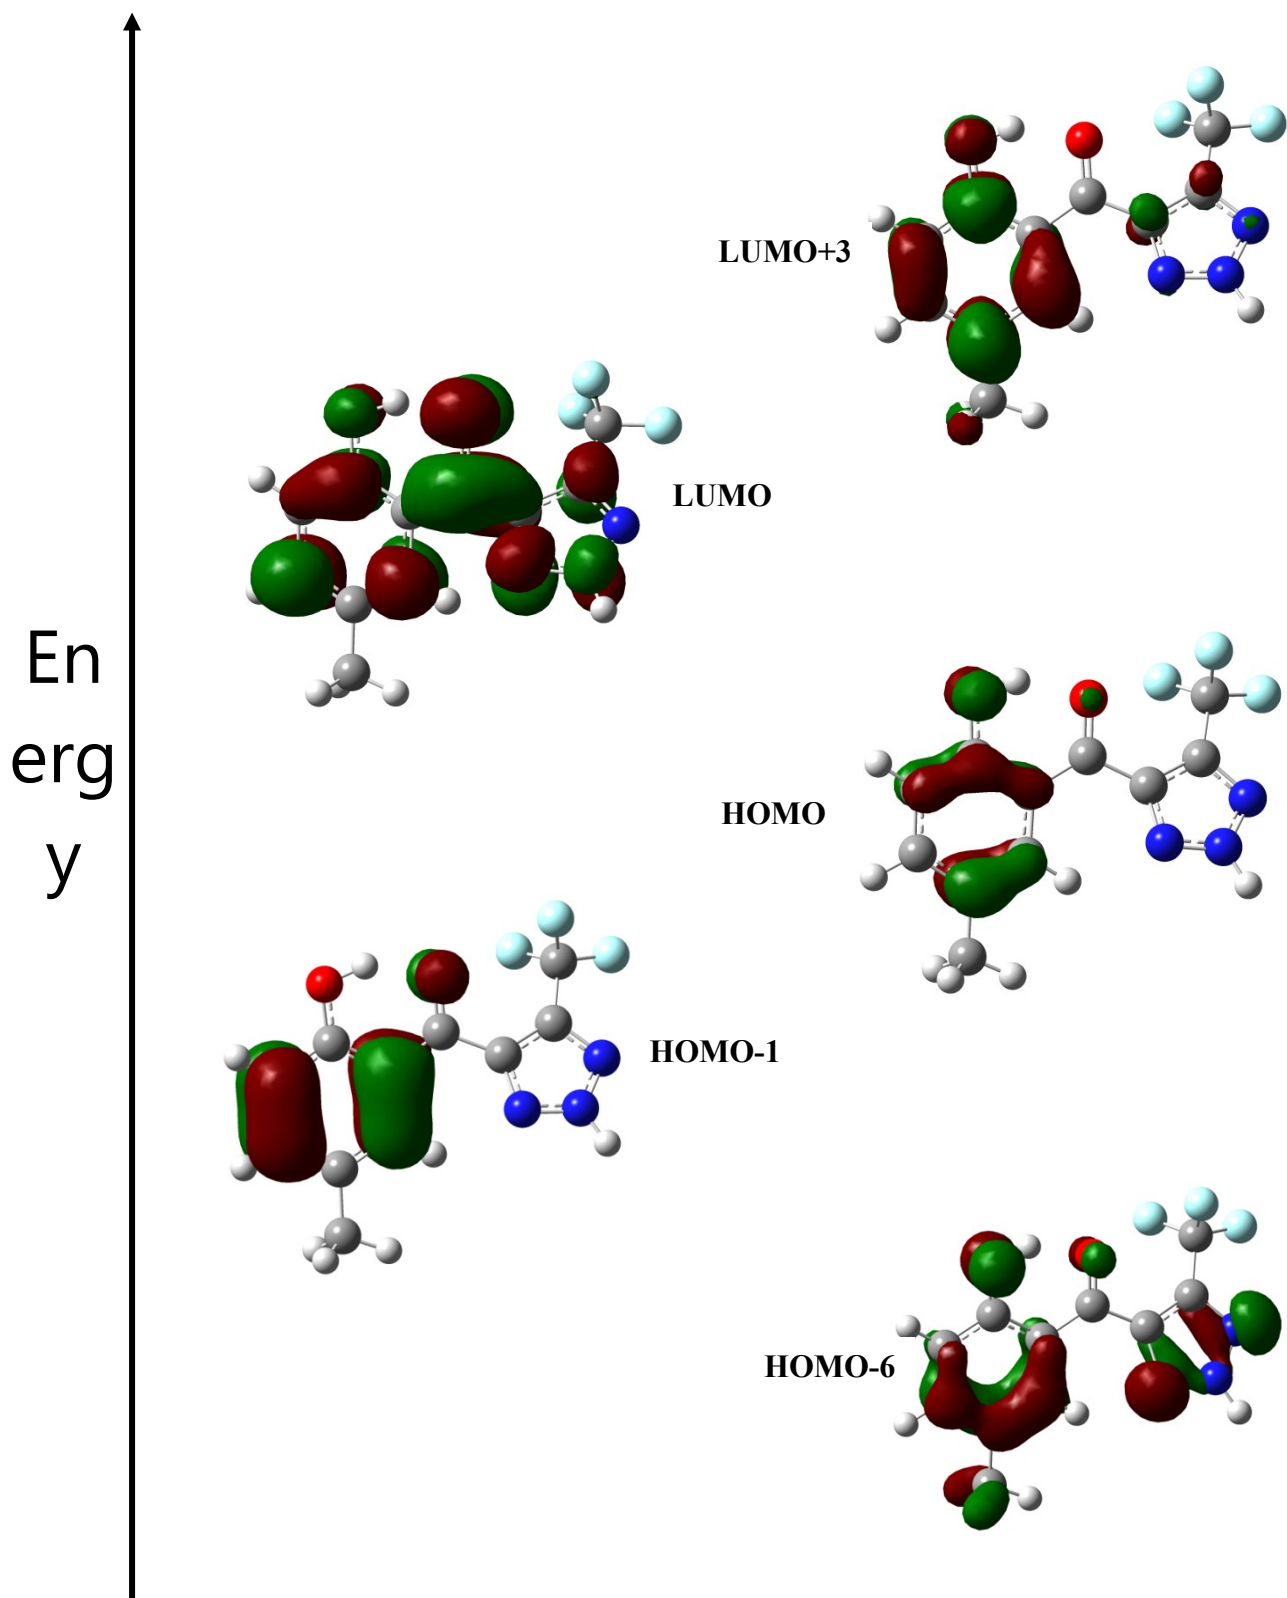

**Figure S9.** Molecular orbitals involved in the electronic transitions of **3**. The energy scale is only qualitative and does not represent the actual energy of the molecular orbitals.



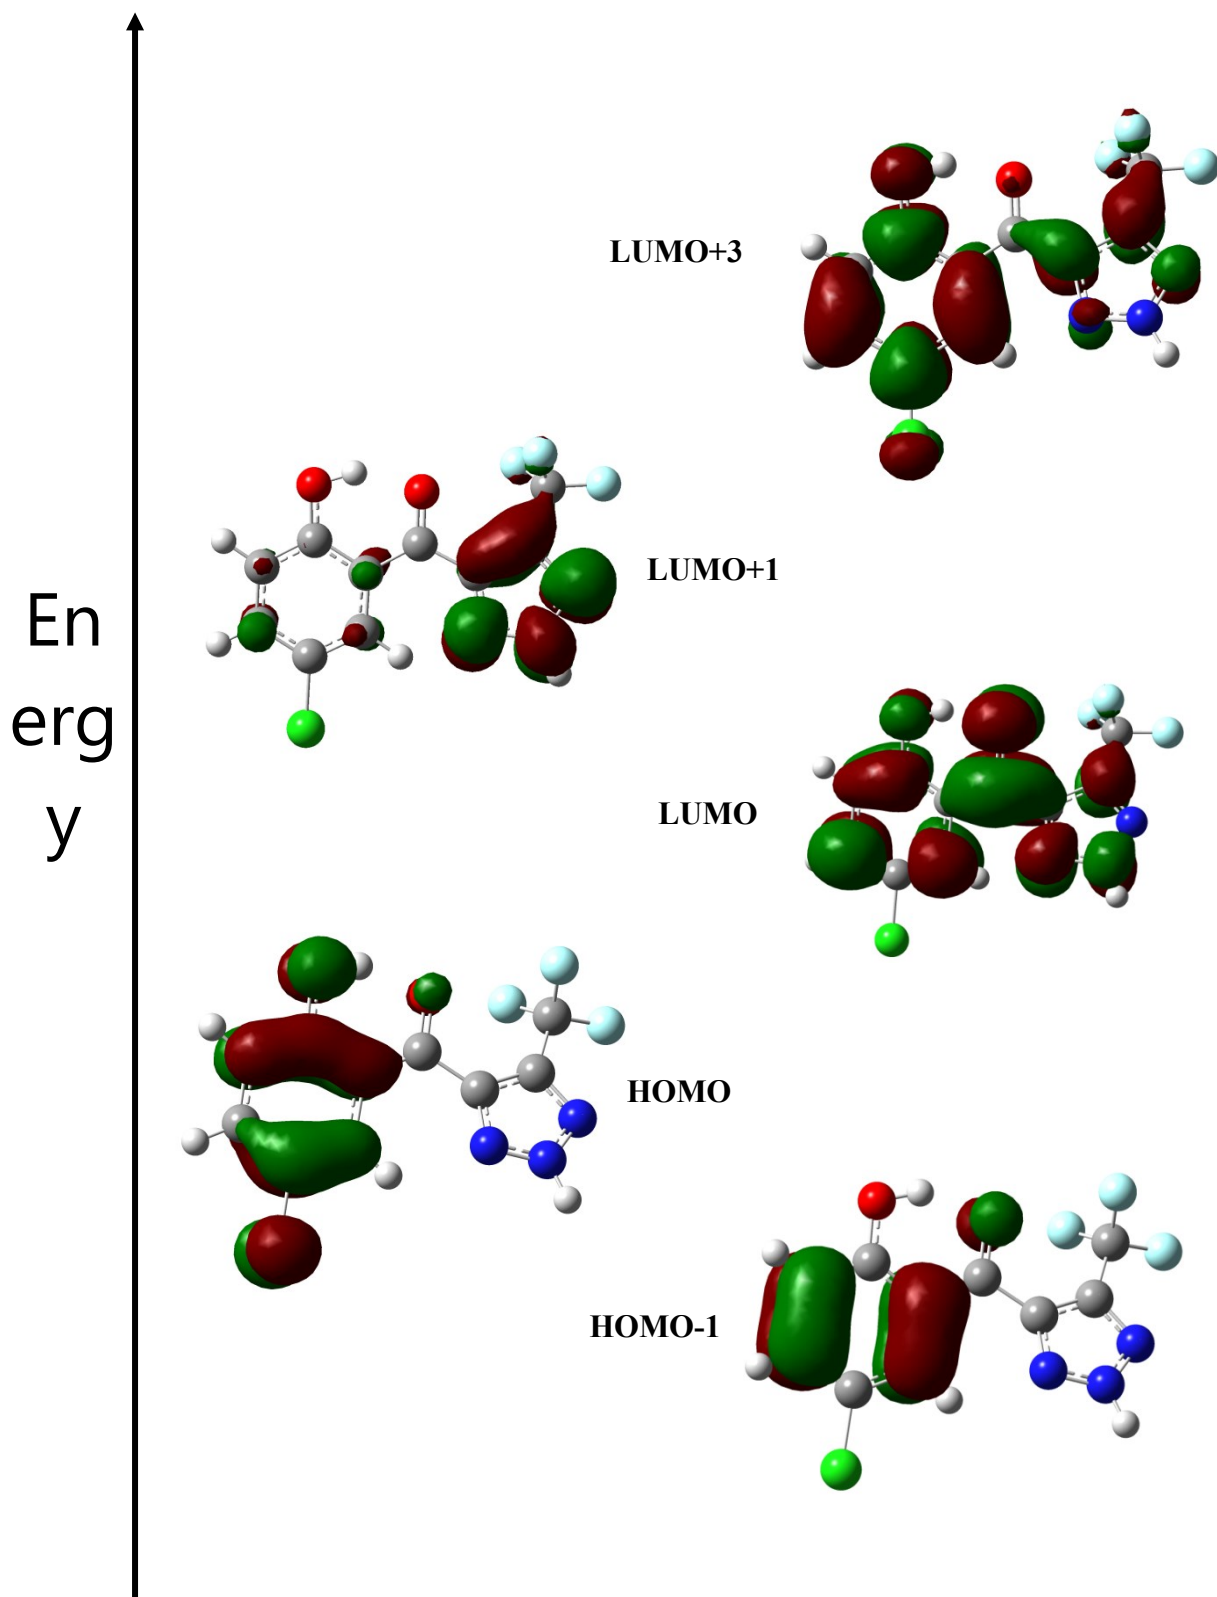

**Figure S10.** Molecular orbitals involved in the electronic transitions of **4**. The energy scale is only qualitative and does not represent the actual energy of the molecular orbitals.

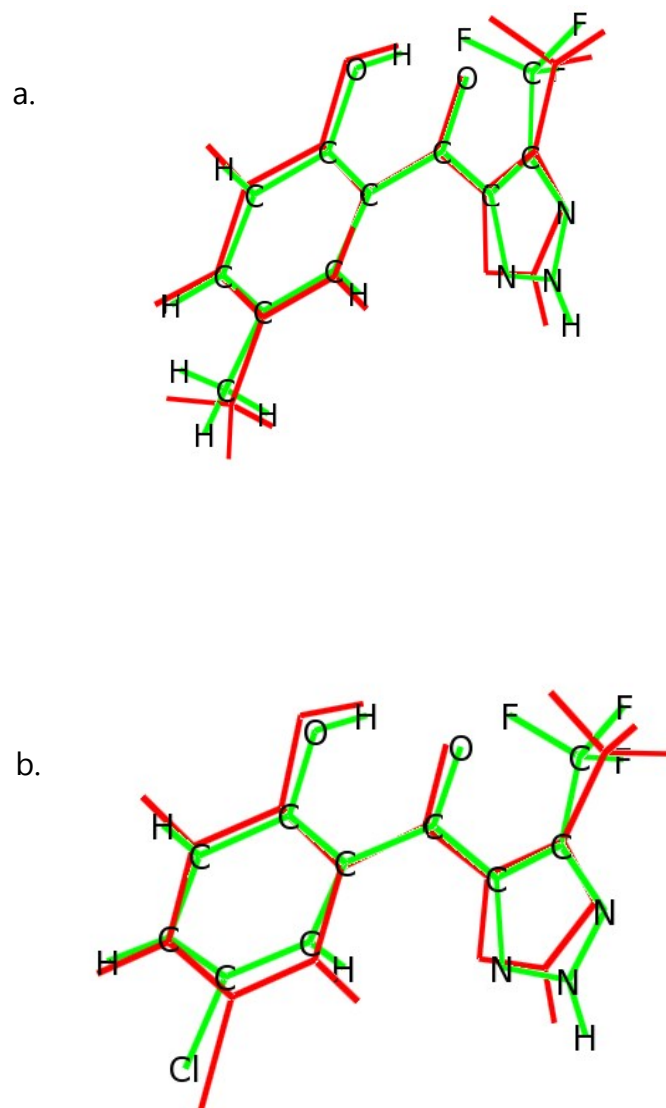

**Figure S11.** Calculated (B3LYP/cc-PVDZ, red) and experimental geometries (green) for:  
a. **3** and b. **4**.

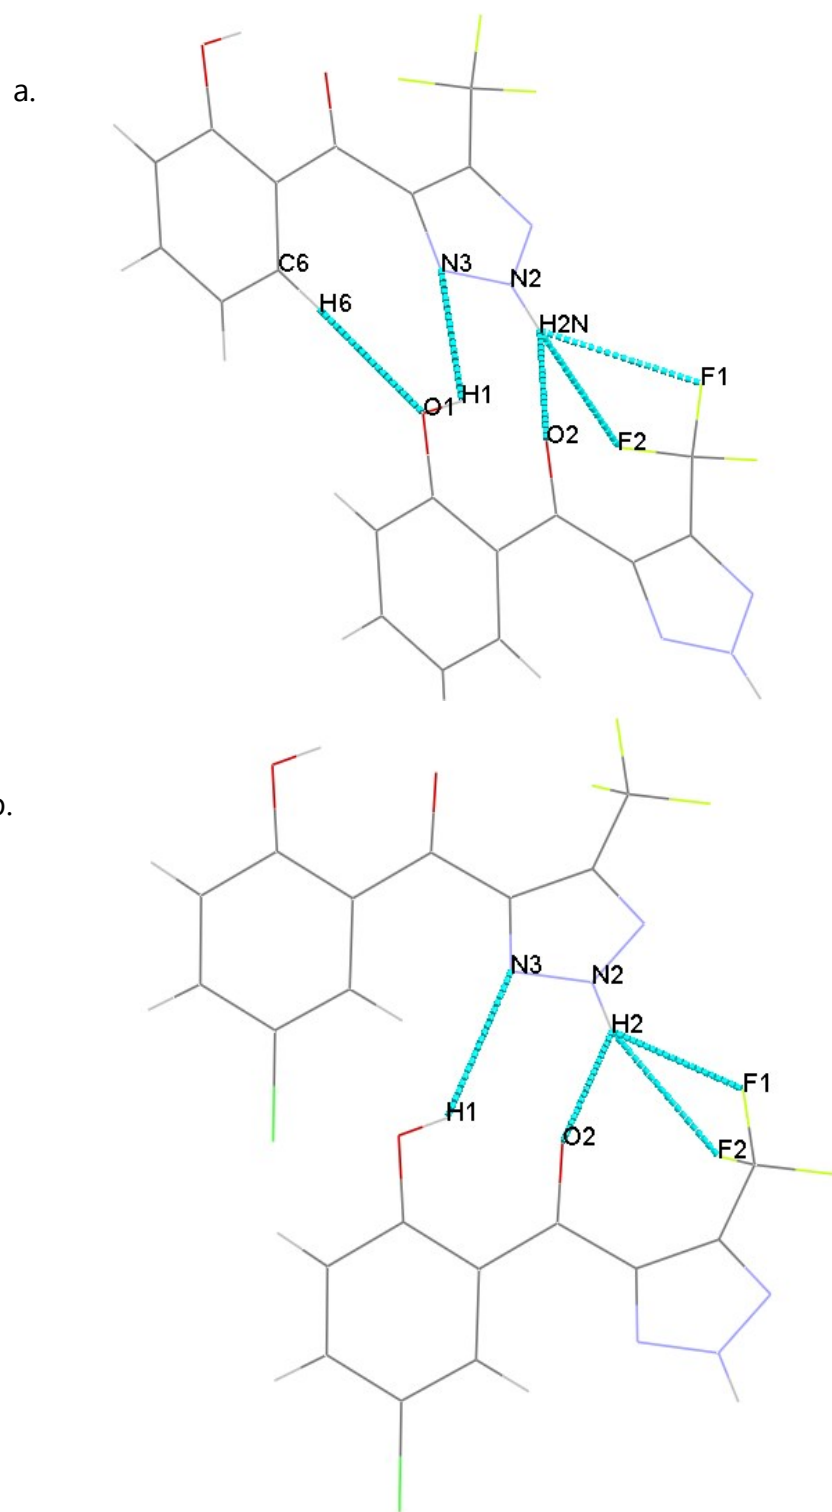

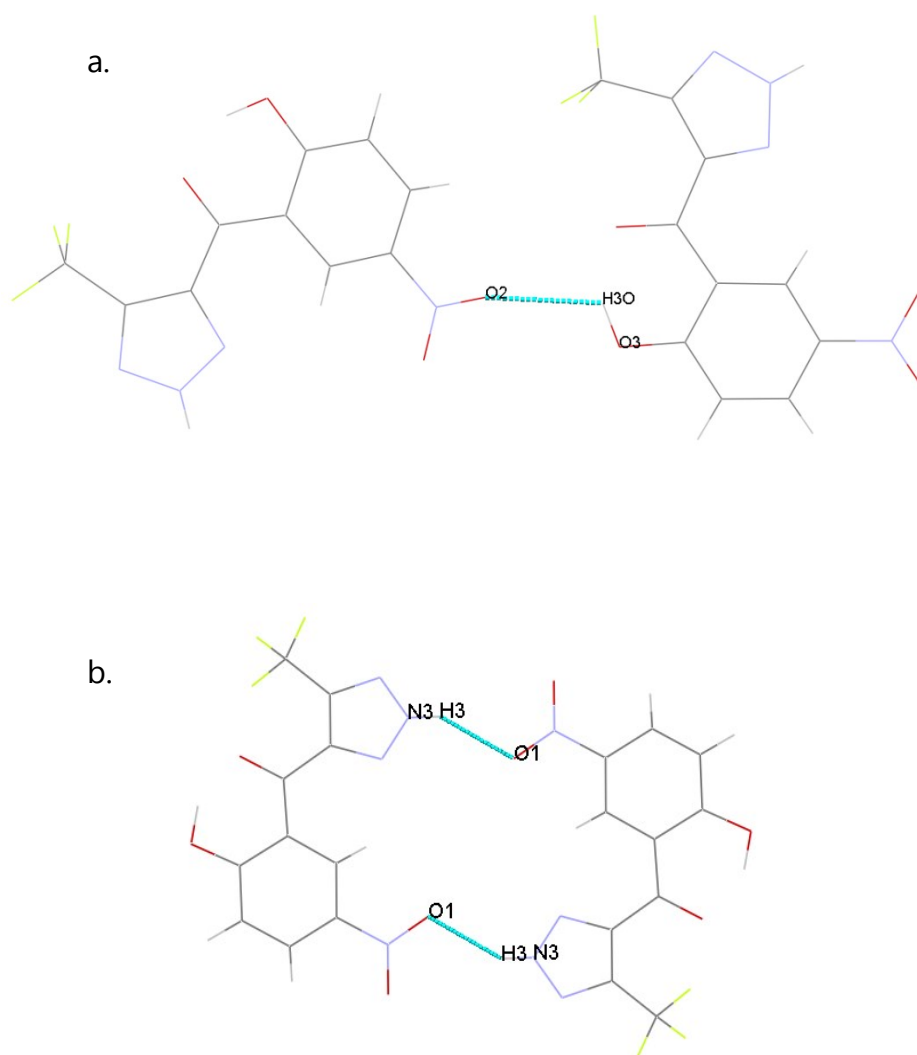

**Figure S13.** Dimers of **2**. a. I and b. II.

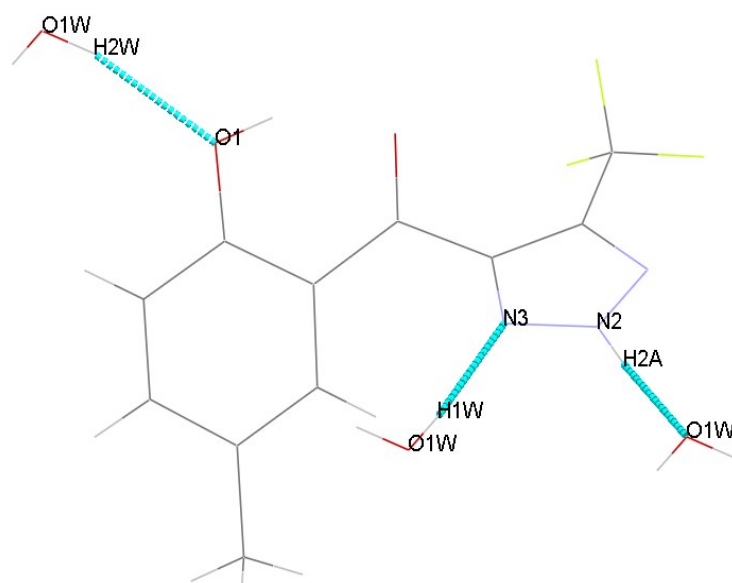

**Figure S14.** Dimer of **3**.

### Referencias.

- 1 V. R. Thalladi, H.-C. Weiss, D. Bläser, R. Boese, A. Nangia and G. R. Desiraju, *J. Am. Chem. Soc.*, 1998, **120**, 8702–8710.
- 2 C. Jelsch, K. Ejsmont and L. Huder, *IUCr*, 2014, **1**, 119–128.
- 3 C. Jelsch, S. Soudani and C. Ben Nasr, *IUCr*, 2015, **2**, 327–340.
